# Supplementary material for: Mechanism of atom economical conversion of alcohols and amines to amides using Fe(ii) pincer catalyst. An outer-sphere metal–ligand pathway or an inner-sphere elimination pathway?
Source: Royal Society of Chemistry journal article supplement (doi:10.1039/c9ra03309b), 2019-01-01
Supplement: c9ra03309b1.pdf [file c9ra03309b1.pdf]

## Supporting Information

Bilal Ahmad Shiekh\*, Damanjit Kaur

Department of Chemistry, UGC Sponsored Centre of Advanced Studies-I, Guru Nanak Dev  
University, Amritsar India 143005.

### S1. Optimized geometries of all the stationary points including the transition states.

All the values are in hartrees except ZPE which is in kcal mol<sup>-1</sup> unless stated otherwise.

Name - INT-A2\\G=-1718.870460\\H=-1718.779880\\SCF E(PBE-D3/BS2)=-  
1719.38517901708\\ZeroPoint=341.290

| Atom | Angstroms     |               |               |
|------|---------------|---------------|---------------|
|      | x             | y             | z             |
| Fe1  | 2.1403736459  | 12.2760993482 | 10.4589552677 |
| O2   | 0.8467199309  | 13.6796097556 | 12.6277364729 |
| P3   | 0.2556187624  | 12.3970249782 | 9.2214920995  |
| N4   | 2.3343937435  | 10.3639045933 | 9.3424998271  |
| C5   | 1.0171936513  | 9.6909804120  | 9.2544164785  |
| H6   | 0.6775263977  | 9.4715255579  | 10.2807273609 |
| H7   | 1.0944546104  | 8.7299141607  | 8.7036228824  |
| C8   | 0.0470059328  | 10.6414884211 | 8.5452248961  |
| H9   | -0.9965142213 | 10.3011365607 | 8.6517851739  |
| H10  | 0.2714178543  | 10.6603282205 | 7.4634323861  |
| P11  | 3.5424792818  | 11.2819385702 | 11.9086602601 |
| C12  | 0.1401841742  | 13.4764020152 | 7.6668516984  |
| H13  | 0.2392479124  | 14.5033337227 | 8.0695962317  |
| C14  | 1.3588118301  | 13.2060833276 | 6.7675097222  |
| H15  | 1.2695910070  | 12.2258876638 | 6.2633715776  |
| H16  | 2.2947355580  | 13.2074292035 | 7.3550439130  |
| H17  | 1.4193719406  | 13.9704860590 | 5.9723212952  |
| C18  | -1.1775429434 | 13.3696902851 | 6.8834611375  |
| H19  | -1.1292980934 | 14.0098923585 | 5.9837904442  |
| H20  | -2.0537742912 | 13.6909887242 | 7.4691176056  |
| H21  | -1.3573647018 | 12.3355634866 | 6.5393582212  |
| C22  | -1.4336833771 | 12.6657348030 | 10.0201947474 |
| H23  | -2.1558064723 | 12.3821219435 | 9.2304305236  |
| C24  | -1.6722974292 | 14.1366608511 | 10.3979883591 |
| H25  | -1.5889926617 | 14.8115443147 | 9.5302046938  |
| H26  | -0.9546334012 | 14.4692447490 | 11.1637454860 |
| H27  | -2.6888005031 | 14.2560093285 | 10.8140964403 |
| C28  | -1.6526536870 | 11.7297211194 | 11.2199994812 |
| H29  | -1.4811949499 | 10.6706679118 | 10.9629188604 |
| H30  | -2.6941254809 | 11.8216508807 | 11.5781225223 |
| H31  | -0.9817092428 | 11.9893668039 | 12.0523509451 |
| C32  | 3.4798727320  | 9.5119583444  | 9.7599463204  |
| H33  | 4.3766302649  | 9.9421756345  | 9.2873169383  |
| H34  | 3.3594188226  | 8.4809379015  | 9.3702628094  |

|     |              |               |               |
|-----|--------------|---------------|---------------|
| C35 | 3.6422547431 | 9.5114560184  | 11.2787641466 |
| H36 | 4.5888017297 | 9.0267476564  | 11.5756991811 |
| H37 | 2.8270250273 | 8.9422651847  | 11.7564989496 |
| C38 | 3.0245426212 | 10.9821450227 | 13.7027611169 |
| H39 | 3.7112488657 | 10.1904012742 | 14.0611568340 |
| C40 | 1.5840202916 | 10.4535799736 | 13.8098243501 |
| H41 | 0.8600053201 | 11.2200957522 | 13.4954345766 |
| H42 | 1.3654372083 | 10.1842373477 | 14.8589619990 |
| H43 | 1.4103629789 | 9.5549566291  | 13.1946890437 |
| C44 | 3.2114391111 | 12.2329628641 | 14.5797273526 |
| H45 | 4.2457313820 | 12.6122247668 | 14.5663513755 |
| H46 | 2.9600206297 | 11.9931178270 | 15.6282571243 |
| H47 | 2.5442149785 | 13.0449932501 | 14.2516383659 |
| C48 | 5.3545772762 | 11.8099808933 | 12.0972755828 |
| H49 | 5.2719049831 | 12.8584891745 | 12.4448505992 |
| C50 | 6.0344576954 | 11.8208485148 | 10.7165110039 |
| H51 | 5.3904202241 | 12.2982414546 | 9.9568759591  |
| H52 | 6.2559975860 | 10.7898217843 | 10.3852366390 |
| H53 | 6.9994598585 | 12.3556711104 | 10.7740571554 |
| C54 | 6.1823775326 | 11.0089458084 | 13.1153057998 |
| H55 | 6.2412460033 | 9.9416219497  | 12.8371553384 |
| H56 | 5.7895634100 | 11.0695882238 | 14.1420065879 |
| H57 | 7.2171666618 | 11.3958814306 | 13.1347839879 |
| C58 | 1.3563150419 | 13.0479515286 | 11.7392566274 |
| O59 | 3.6175904130 | 12.9428672778 | 8.9845602780  |
| C60 | 3.1804015028 | 13.8565733370 | 9.8387152541  |
| H61 | 2.5084737942 | 14.6560803374 | 9.4519839566  |
| H62 | 3.8865776457 | 14.2219455764 | 10.6191956127 |
| H63 | 2.5649055082 | 10.7387323995 | 8.4120501970  |

**Name - INT-A3** \\G=-1853.768417 \\H=-1853.652812 \\SCF E(PBE-D3/BS2)=-1854.36028332021 \\ZeroPoint=398.630

| Atom | Angstroms     |               |               |
|------|---------------|---------------|---------------|
|      | x             | y             | z             |
| Fe1  | 2.4399556959  | 12.2821221141 | 10.3273903028 |
| O2   | 2.0005841661  | 14.6881108424 | 11.9139014409 |
| P3   | 0.5249941942  | 12.5179514471 | 9.3545664435  |
| N4   | 2.4864311159  | 10.4185889876 | 9.3014417663  |
| C5   | 1.1998266670  | 9.9171421623  | 8.7568484458  |
| H6   | 0.6515348782  | 9.4513114309  | 9.5913838758  |
| H7   | 1.3878033065  | 9.1259730076  | 8.0011639071  |
| C8   | 0.3963148917  | 11.0704123526 | 8.1602680196  |
| H9   | -0.6458438192 | 10.7670509962 | 7.9571299255  |
| H10  | 0.8459498897  | 11.3835931758 | 7.2017748426  |
| P11  | 3.2956961582  | 11.1644048920 | 12.0108886822 |
| C12  | 0.0565560329  | 14.0220689431 | 8.2612194890  |

|     |               |               |               |
|-----|---------------|---------------|---------------|
| H13 | 0.2206533215  | 14.8745788799 | 8.9488483685  |
| C14 | 1.0549440569  | 14.1534833929 | 7.1041755442  |
| H15 | 0.8584164620  | 13.4063445575 | 6.3147994600  |
| H16 | 2.0861535004  | 13.9989941569 | 7.4590041262  |
| H17 | 0.9894325870  | 15.1514889211 | 6.6338454390  |
| C18 | -1.3858023636 | 14.0770537740 | 7.7336131217  |
| H19 | -1.5097900053 | 14.9333701937 | 7.0450386627  |
| H20 | -2.1292079653 | 14.1958619209 | 8.5372414141  |
| H21 | -1.6406199713 | 13.1635962708 | 7.1666218646  |
| C22 | -1.1064861099 | 12.3287037766 | 10.3301080749 |
| H23 | -1.9275756208 | 12.4234786858 | 9.5965576462  |
| C24 | -1.2356247041 | 13.4479183774 | 11.3715277109 |
| H25 | -1.2577598677 | 14.4476649521 | 10.9036109930 |
| H26 | -0.3819300149 | 13.4318737324 | 12.0685138011 |
| H27 | -2.1662651222 | 13.3296183455 | 11.9565471805 |
| C28 | -1.2003034069 | 10.9362158056 | 10.9684527483 |
| H29 | -1.4118773030 | 10.1562031879 | 10.2174887528 |
| H30 | -2.0117030594 | 10.9020034948 | 11.7185435830 |
| H31 | -0.2537895884 | 10.6826378635 | 11.4718000628 |
| C32 | 3.2709934165  | 9.3373236978  | 9.9666330461  |
| H33 | 4.3295287307  | 9.5050005646  | 9.7215426640  |
| H34 | 2.9892100259  | 8.3504482332  | 9.5477221813  |
| C35 | 3.0729665646  | 9.3733630918  | 11.4846461728 |
| H36 | 3.7692299750  | 8.6804645081  | 11.9909671944 |
| H37 | 2.0468257917  | 9.0649500554  | 11.7492849404 |
| C38 | 2.5855028501  | 11.1824658686 | 13.7723513566 |
| H39 | 3.0605435915  | 10.3371050826 | 14.3049678070 |
| C40 | 1.0688564582  | 10.9738125629 | 13.7907309292 |
| H41 | 0.5655485245  | 11.7779511516 | 13.2314221146 |
| H42 | 0.6949653404  | 10.9820125444 | 14.8314434375 |
| H43 | 0.7700901794  | 10.0134286414 | 13.3390064729 |
| H44 | 3.0653352910  | 10.8126432055 | 8.5396925961  |
| C45 | 2.9437182500  | 12.4968624720 | 14.4871554108 |
| H46 | 4.0314813545  | 12.6541522982 | 14.5695756162 |
| H47 | 2.5300429547  | 12.4970846490 | 15.5121310233 |
| H48 | 2.5162590470  | 13.3574908184 | 13.9472205837 |
| C49 | 5.1673534789  | 11.2179745905 | 12.4604662714 |
| H50 | 5.3143104540  | 12.2824564239 | 12.7288791554 |
| C51 | 6.0271561344  | 10.9235317864 | 11.2184389439 |
| H52 | 5.6332479592  | 11.4369873061 | 10.3214546998 |
| H53 | 6.0552698332  | 9.8373237690  | 11.0153393866 |
| H54 | 7.0731333124  | 11.2384569889 | 11.3924643014 |
| C55 | 5.6217955141  | 10.3490144237 | 13.6447992318 |
| H56 | 5.3879522605  | 9.2823148289  | 13.4750679906 |
| H57 | 5.1648428722  | 10.6450313905 | 14.6019647896 |
| H58 | 6.7184060489  | 10.4213834161 | 13.7692399851 |
| C59 | 2.1928256767  | 13.6860766921 | 11.2546781272 |
| O60 | 4.3008750533  | 12.3250630203 | 8.9184318029  |
| C61 | 4.6200592209  | 13.4861337619 | 8.3681895759  |
| H62 | 5.6985381741  | 13.6305546573 | 8.0978426892  |
| H63 | 3.9987888808  | 13.8286781928 | 7.4992301211  |
| N64 | 4.3596277132  | 14.6639886965 | 9.4233088600  |

|     |              |               |               |
|-----|--------------|---------------|---------------|
| C65 | 5.3932936860 | 14.6704893266 | 10.4902271847 |
| C66 | 4.1362299699 | 16.0019512916 | 8.8231571648  |
| H67 | 6.3404358322 | 15.0568167243 | 10.0816164412 |
| H68 | 5.5132973617 | 13.6337440544 | 10.8297102232 |
| H69 | 5.0556843104 | 15.3008210636 | 11.3269654041 |
| H70 | 5.0380132897 | 16.3133818440 | 8.2706524174  |
| H71 | 3.9204083783 | 16.7350235117 | 9.6164734853  |
| H72 | 3.2813495308 | 15.9474755115 | 8.1328940160  |
| H73 | 3.4643931686 | 14.2718626461 | 9.8712139012  |

**Name - INT-A4** \\G=-1853.776106 \\H=-1853.675247 \\SCF E(PBE-D3/BS2)=-1854.37868743330 \\ZeroPoint=397.474

| Angstroms |               |               |               |
|-----------|---------------|---------------|---------------|
| Atom      | x             | y             | z             |
| Fe1       | 2.1045346489  | 11.9375068563 | 10.8468703769 |
| O2        | -0.1311366802 | 11.2124832539 | 12.5358184606 |
| P3        | 0.8171000639  | 12.5892325656 | 9.1365725683  |
| N4        | 2.3161928626  | 10.0899127994 | 9.8649734774  |
| C5        | 1.2857053373  | 9.8675852275  | 8.8149141566  |
| H6        | 0.3534069529  | 9.5974138164  | 9.3369346398  |
| H7        | 1.5649948226  | 9.0101649967  | 8.1691553565  |
| C8        | 1.0992269225  | 11.1354581246 | 7.9806090204  |
| H9        | 0.2942591304  | 11.0097698312 | 7.2357654172  |
| H10       | 2.0315833885  | 11.3485302372 | 7.4354481872  |
| P11       | 3.6338947747  | 11.0411154842 | 12.2302771124 |
| C12       | 1.2929476433  | 14.1407015456 | 8.1210510480  |
| H13       | 1.9438829397  | 14.6908791453 | 8.8194636466  |
| C14       | 2.1338357731  | 13.7999298846 | 6.8797254605  |
| H15       | 1.5433500915  | 13.2402208091 | 6.1321251471  |
| H16       | 3.0309428735  | 13.2351212255 | 7.1639393689  |
| H17       | 2.4740929142  | 14.7383215518 | 6.4075438628  |
| C18       | 0.1261877298  | 15.0559721333 | 7.7114332760  |
| H19       | 0.5406341741  | 15.9587851766 | 7.2279425760  |
| H20       | -0.4905781703 | 15.3941801690 | 8.5572589484  |
| H21       | -0.5376343729 | 14.5725694876 | 6.9730774587  |
| C22       | -1.0651757833 | 12.7063015454 | 9.2973107779  |
| H23       | -1.4202718303 | 13.1463666687 | 8.3478385921  |
| C24       | -1.4351785205 | 13.6521275771 | 10.4564409603 |
| H25       | -0.8889992646 | 14.6085369669 | 10.4200813077 |
| H26       | -1.2065850025 | 13.1835302868 | 11.4256912526 |
| H27       | -2.5160371829 | 13.8785283167 | 10.4312176649 |
| C28       | -1.7621549432 | 11.3461071393 | 9.4673455496  |
| H29       | -1.6145221700 | 10.6852136094 | 8.5975253626  |
| H30       | -2.8507821435 | 11.5034142819 | 9.5754293693  |
| H31       | -1.4161611546 | 10.8224765295 | 10.3727020642 |
| C32       | 2.3567484701  | 8.9530857034  | 10.8305483775 |
| H33       | 2.6004144468  | 8.0074888315  | 10.3063272668 |
| H34       | 1.3289956744  | 8.8604645328  | 11.2181328290 |
| C35       | 3.3303874038  | 9.1933286787  | 12.0007633181 |

|     |              |               |               |
|-----|--------------|---------------|---------------|
| H36 | 4.2938586393 | 8.6849118830  | 11.8320337146 |
| H37 | 2.9117956672 | 8.7679625675  | 12.9277954038 |
| C38 | 3.6173393851 | 11.3170984010 | 14.0915331378 |
| H39 | 4.3320279604 | 10.5873916230 | 14.5155555519 |
| C40 | 2.2411289354 | 11.0729928368 | 14.7250394459 |
| H41 | 1.5159893427 | 11.8340386125 | 14.3997530026 |
| H42 | 2.3271358242 | 11.1325781571 | 15.8247148425 |
| H43 | 1.8246957363 | 10.0829236118 | 14.4756839207 |
| H44 | 3.2293700657 | 10.1944961618 | 9.3963694093  |
| C45 | 4.1050968631 | 12.7461872770 | 14.3884141847 |
| H46 | 5.1380525219 | 12.9215381393 | 14.0460224373 |
| H47 | 4.0737689444 | 12.9418973776 | 15.4749818898 |
| H48 | 3.4524781618 | 13.4822720294 | 13.8868101770 |
| C49 | 5.4901562542 | 11.1445719534 | 11.8365746605 |
| H50 | 5.7110348120 | 12.2267572750 | 11.8648976681 |
| C51 | 5.7531858469 | 10.6565354812 | 10.4016821142 |
| H52 | 5.0943804657 | 11.1950254589 | 9.7003988773  |
| H53 | 5.5943906113 | 9.5667892867  | 10.3045111853 |
| H54 | 6.8037997634 | 10.8536495794 | 10.1241488544 |
| C55 | 6.3985382913 | 10.4229914014 | 12.8454914984 |
| H56 | 6.1419864311 | 9.3525875843  | 12.9407761711 |
| H57 | 6.3675742279 | 10.8705853471 | 13.8514710658 |
| H58 | 7.4452986341 | 10.4752265512 | 12.4952612508 |
| C59 | 0.8046672943 | 11.4904869285 | 11.8483691596 |
| O60 | 3.4842866304 | 12.6007866056 | 9.5418752397  |
| C61 | 4.1194341808 | 13.7840802063 | 9.8709101766  |
| H62 | 4.8933977671 | 13.6343630996 | 10.6846370233 |
| H63 | 3.4158182615 | 14.5530498569 | 10.2671766764 |
| N64 | 4.7760109110 | 14.4045695695 | 8.6974488827  |
| C65 | 5.8046444037 | 13.5401033322 | 8.1337563784  |
| C66 | 5.3277594594 | 15.7040094324 | 9.0551372518  |
| H67 | 2.0681922971 | 13.2865513065 | 11.5269607540 |
| H68 | 4.5282140704 | 16.3591740705 | 9.4438350875  |
| H69 | 5.7661873630 | 16.1892115632 | 8.1652944560  |
| H70 | 6.1288492129 | 15.6491881709 | 9.8362435763  |
| H71 | 6.2270035828 | 13.9980406765 | 7.2218443616  |
| H72 | 5.3562086968 | 12.5710575185 | 7.8662356048  |
| H73 | 6.6492195456 | 13.3417402321 | 8.8419994339  |

**Name-catalyst**\\G=-1604.497614\\H=-1604.408226\\SCF E(PBE-D3/BS2)=-1604.97007231294\\ZeroPoint=317.315

| Atom | Angstroms    |               |               |
|------|--------------|---------------|---------------|
|      | x            | y             | z             |
| Fe1  | 1.8707542149 | 12.0365546566 | 10.7078885547 |
| O2   | 2.5805932185 | 14.8183102890 | 11.1510032995 |
| P3   | 0.2822708630 | 12.4176604549 | 9.2515126854  |
| N4   | 2.1031998292 | 10.4278421461 | 9.8224022719  |
| C5   | 1.3370658434 | 9.9609333203  | 8.6509234082  |

|     |               |               |               |
|-----|---------------|---------------|---------------|
| H6  | 0.6348340945  | 9.1586646760  | 8.9691112134  |
| H7  | 2.0252192648  | 9.4804660593  | 7.9217363036  |
| C8  | 0.5669436633  | 11.0961168474 | 7.9682916481  |
| H9  | -0.3723626348 | 10.7459107727 | 7.5064233555  |
| H10 | 1.1806616403  | 11.5512450913 | 7.1726884836  |
| P11 | 3.3360302358  | 11.2841145640 | 12.1359623073 |
| C12 | 0.2212215138  | 14.0310754660 | 8.2818917930  |
| H13 | 0.0417186761  | 14.7981898835 | 9.0591509154  |
| C14 | 1.5909557808  | 14.3194566359 | 7.6435777144  |
| H15 | 1.8075366731  | 13.6180474817 | 6.8187422356  |
| H16 | 2.4050890354  | 14.2379036695 | 8.3806159631  |
| H17 | 1.6032031657  | 15.3390356341 | 7.2197391866  |
| C18 | -0.9087022755 | 14.0927927766 | 7.2417495319  |
| H19 | -0.8712781831 | 15.0532260890 | 6.6972741664  |
| H20 | -1.9082511764 | 14.0112200361 | 7.6985491317  |
| H21 | -0.8081301473 | 13.2861251322 | 6.4942648951  |
| C22 | -1.4881605738 | 12.1528008460 | 9.8299528703  |
| H23 | -2.1303888600 | 12.1723333592 | 8.9286785251  |
| C24 | -1.9111044654 | 13.2759490299 | 10.7885381532 |
| H25 | -1.9068820108 | 14.2662035459 | 10.3027356536 |
| H26 | -1.2250209438 | 13.3167340478 | 11.6527740626 |
| H27 | -2.9324980231 | 13.0922759973 | 11.1667204631 |
| C28 | -1.6036442018 | 10.7738702386 | 10.4996029015 |
| H29 | -1.4097911216 | 9.9518520704  | 9.7907963337  |
| H30 | -2.6198588173 | 10.6306181607 | 10.9087460808 |
| H31 | -0.8744639286 | 10.6916462460 | 11.3239549337 |
| C32 | 3.0122107066  | 9.3368013293  | 10.2318535142 |
| H33 | 3.8800102014  | 9.3097998764  | 9.5379142919  |
| H34 | 2.5029517093  | 8.3560283593  | 10.1129679931 |
| C35 | 3.4929871793  | 9.4851644880  | 11.6808512489 |
| H36 | 4.5178392079  | 9.1019562204  | 11.8254017505 |
| H37 | 2.8325098034  | 8.9225913125  | 12.3612805729 |
| C38 | 2.9810203895  | 11.3061261881 | 13.9819437006 |
| H39 | 3.7916636540  | 10.7342934885 | 14.4734212027 |
| C40 | 1.6338419814  | 10.6314473454 | 14.2853800770 |
| H41 | 0.8213697787  | 11.1431606750 | 13.7418580060 |
| H42 | 1.4211302918  | 10.6828760047 | 15.3680932670 |
| H43 | 1.6160999232  | 9.5686080693  | 13.9923339645 |
| H44 | 0.8899058649  | 12.2255410450 | 11.8133816550 |
| C45 | 2.9916894026  | 12.7580232157 | 14.4902228827 |
| H46 | 3.9722538671  | 13.2446976741 | 14.3577465159 |
| H47 | 2.7448516075  | 12.7885252775 | 15.5661012572 |
| H48 | 2.2390214492  | 13.3571329010 | 13.9492392379 |
| C49 | 5.0736101616  | 11.9959656465 | 11.9772911672 |
| H50 | 4.9356721237  | 13.0736245665 | 12.1868353396 |
| C51 | 5.5307147130  | 11.8547045497 | 10.5147556026 |
| H52 | 4.7555031545  | 12.2285014879 | 9.8246585871  |
| H53 | 5.7334523332  | 10.7997191943 | 10.2593822608 |
| H54 | 6.4628134276  | 12.4219472595 | 10.3456737068 |
| C55 | 6.1039542613  | 11.4197514084 | 12.9586489560 |
| H56 | 6.2195787167  | 10.3290625322 | 12.8296564704 |
| H57 | 5.8366575873  | 11.6102797219 | 14.0107005296 |

|     |              |               |               |
|-----|--------------|---------------|---------------|
| H58 | 7.0938881432 | 11.8766626049 | 12.7800650255 |
| C59 | 2.2708722246 | 13.6782963363 | 10.9772332595 |

**Name - TS-A2** \\G=-1853.758140 \\H=-1853.643561 \\SCF E (PBE-D3/BS2)=-1854.34703331495 \\ZeroPoint=396.354

| Atom | Angstroms     |               |               |
|------|---------------|---------------|---------------|
|      | x             | y             | z             |
| Fe1  | 2.3675425722  | 12.2160938578 | 10.2109527267 |
| O2   | 2.1722381355  | 14.8345596683 | 11.4470352414 |
| P3   | 0.3544514901  | 12.3502241327 | 9.4000358420  |
| N4   | 2.4026518941  | 10.3038087609 | 9.2575199660  |
| C5   | 1.0598686934  | 9.7336525156  | 8.9543196761  |
| H6   | 0.6393426699  | 9.3718810597  | 9.9065034351  |
| H7   | 1.1626541295  | 8.8599091177  | 8.2774933279  |
| C8   | 0.1623228050  | 10.8065680361 | 8.3452074435  |
| H9   | -0.8821854273 | 10.4574455298 | 8.2713772252  |
| H10  | 0.5034917493  | 11.0468936043 | 7.3220791715  |
| P11  | 3.3559146845  | 11.2046679138 | 11.8757537209 |
| C12  | -0.1191026658 | 13.7467953091 | 8.1871087711  |
| H13  | -0.0572529271 | 14.6551123233 | 8.8177111004  |
| C14  | 0.9696830563  | 13.8536038512 | 7.1111184544  |
| H15  | 0.9156726329  | 13.0150839391 | 6.3935354721  |
| H16  | 1.9628302826  | 13.8280122612 | 7.5814533847  |
| H17  | 0.8681277691  | 14.7900151189 | 6.5335155274  |
| C18  | -1.5169278088 | 13.6676523912 | 7.5552780797  |
| H19  | -1.6499674733 | 14.4792655476 | 6.8160153509  |
| H20  | -2.3266682657 | 13.7666139643 | 8.2955154576  |
| H21  | -1.6608490923 | 12.7119421054 | 7.0200557645  |
| C22  | -1.2178075177 | 12.2983799735 | 10.4715600805 |
| H23  | -2.0791770500 | 12.3937407466 | 9.7852215736  |
| C24  | -1.2152434590 | 13.4851661319 | 11.4448963820 |
| H25  | -1.2194922858 | 14.4540013527 | 10.9161382339 |
| H26  | -0.3132140765 | 13.4612080048 | 12.0794868415 |
| H27  | -2.1045915646 | 13.4556788829 | 12.1003752736 |
| C28  | -1.3378183729 | 10.9534340415 | 11.2016186550 |
| H29  | -1.5791880318 | 10.1304788276 | 10.5076171697 |
| H30  | -2.1403252640 | 10.9919793278 | 11.9608354535 |
| H31  | -0.3937331671 | 10.7048929367 | 11.7112119887 |
| C32  | 3.2867123996  | 9.2938296729  | 9.9142526548  |
| H33  | 4.3178963675  | 9.5147798469  | 9.6017511099  |
| H34  | 3.0421312241  | 8.2756057354  | 9.5490438195  |
| C35  | 3.1676802289  | 9.3854682077  | 11.4379866277 |
| H36  | 3.9186152808  | 8.7393932548  | 11.9269916374 |

|     |              |               |               |
|-----|--------------|---------------|---------------|
| H37 | 2.1727124252 | 9.0467946310  | 11.7739188801 |
| C38 | 2.7573709464 | 11.3036579102 | 13.6756279034 |
| H39 | 3.2817045898 | 10.5057121937 | 14.2337155365 |
| C40 | 1.2497133310 | 11.0685028040 | 13.7897618120 |
| H41 | 0.7054031971 | 11.8283877023 | 13.2073952956 |
| H42 | 0.9281269729 | 11.1338316802 | 14.8457351197 |
| H43 | 0.9496418020 | 10.0769637692 | 13.4110164561 |
| H44 | 2.8364510814 | 10.5668898073 | 8.3612852289  |
| C45 | 3.1259978658 | 12.6714461893 | 14.2765920961 |
| H46 | 4.2150491561 | 12.8352868076 | 14.3248254114 |
| H47 | 2.7329917818 | 12.7570642057 | 15.3059232381 |
| H48 | 2.6872710970 | 13.4870455533 | 13.6769042813 |
| C49 | 5.2511652145 | 11.3136779712 | 12.2234801448 |
| H50 | 5.3822563424 | 12.3775810509 | 12.4925156332 |
| C51 | 6.0657815108 | 11.0671340312 | 10.9433909002 |
| H52 | 5.6270796118 | 11.5964869408 | 10.0826595638 |
| H53 | 6.1147145040 | 9.9886454260  | 10.7061344704 |
| H54 | 7.1083066093 | 11.4096617398 | 11.0810410369 |
| C55 | 5.7920793292 | 10.4576965932 | 13.3806873156 |
| H56 | 5.5873725397 | 9.3831569512  | 13.2240750587 |
| H57 | 5.3732123775 | 10.7406490927 | 14.3594116272 |
| H58 | 6.8906883656 | 10.5674205295 | 13.4515581150 |
| C59 | 2.2440281931 | 13.7285177867 | 10.9592365539 |
| O60 | 4.0293763459 | 12.5438678269 | 8.8521769845  |
| C61 | 4.4216754346 | 13.6370933018 | 8.3817555587  |
| H62 | 5.4849746086 | 13.7769192507 | 8.0994498746  |
| H63 | 3.7186200307 | 14.4400951630 | 8.0928196199  |
| N64 | 4.9126232800 | 15.4361201377 | 10.0498135158 |
| C65 | 5.7014670448 | 14.9681680608 | 11.1808389073 |
| C66 | 5.5034125897 | 16.5509431447 | 9.3223789854  |
| H67 | 3.9587644202 | 15.6478664835 | 10.3608473082 |
| H68 | 4.8271125861 | 16.8673627139 | 8.5102832486  |
| H69 | 6.4580136698 | 16.2309829077 | 8.8654045378  |
| H70 | 5.7181058620 | 17.4376684279 | 9.9593511819  |
| H71 | 6.6350209975 | 14.4987568236 | 10.8215742846 |
| H72 | 5.1187709911 | 14.2076196019 | 11.7192609408 |
| H73 | 5.9788613624 | 15.7750389995 | 11.8954377201 |

**Name - INT-B1** \\G=-1720.058589 \\H=-1719.960668 \\SCF E (PBE-D3/BS2) ==-1720.58781815268 \\ZeroPoint=350.043

| Atom | Angstroms    |               |               |
|------|--------------|---------------|---------------|
|      | x            | y             | z             |
| Fe1  | 2.4752309377 | 11.9824976122 | 10.5042705156 |
| O2   | 3.2982520884 | 14.7224575096 | 11.0413122669 |
| P3   | 0.8179505238 | 12.5207749615 | 9.1521475282  |
| N4   | 2.2332124162 | 10.1908084873 | 9.8589520149  |
| C5   | 1.0441773820 | 9.8052407273  | 9.0654461853  |
| H6   | 0.2198735308 | 9.5037711744  | 9.7442751903  |



|     |               |               |               |
|-----|---------------|---------------|---------------|
| H7  | 1.2770498753  | 8.9113933557  | 8.4467759313  |
| C8  | 0.5999003834  | 10.9590325432 | 8.1632664037  |
| H9  | -0.4236126371 | 10.8228270432 | 7.7745627452  |
| H10 | 1.2914118032  | 11.0392798548 | 7.3057554614  |
| P11 | 3.7197040256  | 11.0793307123 | 12.0815010782 |
| C12 | 0.9385012893  | 13.9093634253 | 7.8800015954  |
| H13 | 0.8117629962  | 14.8308283921 | 8.4802484877  |
| C14 | 2.3356528124  | 13.9466334262 | 7.2439135729  |
| H15 | 2.5288643961  | 13.0405782650 | 6.6435975961  |
| H16 | 3.1234777080  | 14.0217218970 | 8.0088969234  |
| H17 | 2.4222720269  | 14.8159564439 | 6.5683186994  |
| C18 | -0.1622720043 | 13.8567366028 | 6.8066402814  |
| H19 | -0.0721620938 | 14.7278352456 | 6.1330544516  |
| H20 | -1.1782320251 | 13.8756936796 | 7.2333576697  |
| H21 | -0.0697142222 | 12.9486760914 | 6.1858115302  |
| C22 | -0.8424743542 | 12.8770034512 | 9.9700450386  |
| H23 | -1.5463514547 | 13.1225983122 | 9.1524823601  |
| C24 | -0.7153911117 | 14.0904934372 | 10.9057405756 |
| H25 | -0.3654571277 | 14.9954415635 | 10.3809120831 |
| H26 | 0.0008833486  | 13.8731575329 | 11.7166638823 |
| H27 | -1.6949443920 | 14.3246212720 | 11.3594630198 |
| C28 | -1.3791628126 | 11.6511287915 | 10.7243934321 |
| H29 | -1.6155628077 | 10.8146291391 | 10.0469769174 |
| H30 | -2.3070829157 | 11.9155005470 | 11.2626074264 |
| H31 | -0.6428735625 | 11.2993299119 | 11.4676158622 |
| C32 | 2.6803651173  | 9.0123802909  | 10.6354298087 |
| H33 | 2.8908975818  | 8.1662168379  | 9.9458726207  |
| H34 | 1.8624358144  | 8.6683603193  | 11.3019098249 |
| C35 | 3.9309534701  | 9.3383296068  | 11.4564005188 |
| H36 | 4.8169585673  | 9.3538082140  | 10.7967116302 |
| H37 | 4.1114257030  | 8.6013253086  | 12.2576385506 |
| C38 | 2.9292385677  | 10.9494705337 | 13.7878225424 |
| H39 | 3.6806314625  | 10.4715359873 | 14.4442659843 |
| C40 | 1.6711970391  | 10.0685344902 | 13.7648838342 |
| H41 | 0.9478025339  | 10.4432888337 | 13.0203258819 |
| H42 | 1.1810485414  | 10.0845650876 | 14.7548440690 |
| H43 | 1.9026464201  | 9.0180799901  | 13.5259098485 |
| H44 | 3.3495528046  | 10.1388621858 | 8.6139544788  |
| C45 | 2.6130292681  | 12.3542498821 | 14.3270769066 |
| H46 | 3.5087837973  | 12.9940858741 | 14.3931260102 |
| H47 | 2.1776013454  | 12.2826728427 | 15.3395609158 |
| H48 | 1.8850907159  | 12.8603924459 | 13.6701744596 |
| C49 | 5.4579176844  | 11.6849223680 | 12.4967607432 |
| H50 | 5.2806085191  | 12.6084139861 | 13.0811666406 |
| C51 | 6.2263849553  | 12.0698126269 | 11.2241221332 |
| H52 | 5.6535739307  | 12.7777459698 | 10.6052188678 |
| H53 | 6.4512279162  | 11.1816618551 | 10.6077360125 |
| H54 | 7.1904271659  | 12.5384632985 | 11.4901157070 |
| C55 | 6.2655336745  | 10.6987851423 | 13.3584718413 |
| H56 | 6.4595099138  | 9.7587099265  | 12.8129600193 |
| H57 | 5.7631515371  | 10.4458803515 | 14.3061247966 |
| H58 | 7.2458025148  | 11.1396249204 | 13.6135911620 |

|     |              |               |               |
|-----|--------------|---------------|---------------|
| C59 | 2.9698805537 | 13.6014891029 | 10.8120342675 |
| H60 | 1.4793433795 | 12.1473631254 | 11.5685061416 |
| O61 | 4.0244293030 | 10.1500976353 | 7.8453340197  |
| C62 | 4.6851208936 | 11.3865134748 | 8.0202694499  |
| H63 | 4.7122249685 | 11.9702049433 | 7.0799490207  |
| H64 | 5.7273547163 | 11.2686443550 | 8.3811476570  |
| H65 | 4.1455769227 | 12.0184297321 | 8.7781021058  |

**Name - INT-B2** \\G=-1720.050232 \\H=-1719.956181 \\SCF E (PBE-D3/BS2) =-1720.58225792327 \\ZeroPoint=349.133

| Atom | Angstroms     |               |               |
|------|---------------|---------------|---------------|
|      | x             | y             | z             |
| Fe1  | 2.5393037557  | 11.9843131713 | 10.4418201627 |
| O2   | 3.1318381355  | 14.7131540966 | 11.2304505149 |
| P3   | 0.8435756395  | 12.5154382881 | 9.1252033282  |
| N4   | 2.2666595836  | 10.0867584084 | 9.7569620805  |
| C5   | 0.9478762106  | 9.7810663451  | 9.1384649761  |
| H6   | 0.2030080723  | 9.6387396221  | 9.9401678921  |
| H7   | 1.0128650134  | 8.8286771253  | 8.5729979372  |
| C8   | 0.5454951077  | 10.9231428246 | 8.2042870016  |
| H9   | -0.4862549975 | 10.8137369073 | 7.8299054786  |
| H10  | 1.2364469718  | 10.9368501723 | 7.3420378001  |
| P11  | 3.7553100845  | 11.0623248793 | 12.0346633723 |
| C12  | 0.9286463525  | 13.8512155541 | 7.7927797901  |
| H13  | 0.7384586131  | 14.7892763493 | 8.3496353976  |
| C14  | 2.3345648036  | 13.9313568433 | 7.1826851794  |
| H15  | 2.5837476417  | 13.0072509364 | 6.6326324245  |
| H16  | 3.0992491708  | 14.0787229034 | 7.9608084083  |
| H17  | 2.3940269304  | 14.7713689539 | 6.4680469647  |
| C18  | -0.1464607439 | 13.6960797111 | 6.7029044590  |
| H19  | -0.1071913383 | 14.5574609016 | 6.0123711505  |
| H20  | -1.1694103385 | 13.6474742370 | 7.1110713035  |
| H21  | 0.0247373733  | 12.7855731876 | 6.1033206252  |
| C22  | -0.7792614099 | 12.9667256262 | 9.9763651387  |
| H23  | -1.4635466600 | 13.2896062569 | 9.1688284575  |
| C24  | -0.5496091199 | 14.1434121373 | 10.9391418523 |
| H25  | -0.0989943867 | 15.0190079363 | 10.4424339458 |
| H26  | 0.1247390245  | 13.8370456719 | 11.7563936186 |
| H27  | -1.5089600560 | 14.4661121636 | 11.3812684539 |
| C28  | -1.4201353576 | 11.7788975208 | 10.7082980475 |
| H29  | -1.7032808806 | 10.9647048427 | 10.0213632917 |
| H30  | -2.3383269894 | 12.1087374665 | 11.2268584741 |
| H31  | -0.7309104561 | 11.3722879810 | 11.4691570461 |
| C32  | 2.6841633966  | 8.9595137977  | 10.6373774875 |
| H33  | 2.8516743226  | 8.0539115436  | 10.0195277296 |

|     |              |               |               |
|-----|--------------|---------------|---------------|
| H34 | 1.8584612544 | 8.7314251948  | 11.3327307989 |
| C35 | 3.9564161548 | 9.3160661883  | 11.4112316021 |
| H36 | 4.8227041670 | 9.3284127068  | 10.7251095658 |
| H37 | 4.1670153433 | 8.5846406759  | 12.2105971093 |
| C38 | 2.9527406105 | 10.9453746463 | 13.7410734639 |
| H39 | 3.7345090390 | 10.5502146278 | 14.4173830977 |
| C40 | 1.7535380141 | 9.9872464466  | 13.7741580740 |
| H41 | 0.9921996161 | 10.2888597630 | 13.0335006332 |
| H42 | 1.2811894838 | 10.0112687171 | 14.7725934727 |
| H43 | 2.0452426912 | 8.9435185710  | 13.5726817074 |
| H44 | 2.9957803863 | 10.0802301422 | 8.8872482141  |
| C45 | 2.5428480053 | 12.3494155332 | 14.2171759051 |
| H46 | 3.3845134249 | 13.0627521176 | 14.2212371579 |
| H47 | 2.1431308798 | 12.2984648279 | 15.2456525057 |
| H48 | 1.7588855373 | 12.7584313810 | 13.5573446821 |
| C49 | 5.4855386879 | 11.6467632868 | 12.5229595550 |
| H50 | 5.2772389491 | 12.4787354368 | 13.2235258261 |
| C51 | 6.2656354612 | 12.2190415193 | 11.3308691168 |
| H52 | 5.6674871169 | 12.9558053090 | 10.7719070877 |
| H53 | 6.5665823140 | 11.4213338980 | 10.6303815090 |
| H54 | 7.1883372913 | 12.7125905847 | 11.6837384040 |
| C55 | 6.3056002842 | 10.5737540826 | 13.2616871175 |
| H56 | 6.5590361206 | 9.7348477642  | 12.5904066639 |
| H57 | 5.7816844519 | 10.1599598848 | 14.1391639969 |
| H58 | 7.2557311169 | 11.0085846933 | 13.6203111255 |
| C59 | 2.8897965478 | 13.5971516059 | 10.9023231482 |
| H60 | 1.4559684843 | 11.8734787072 | 11.4488245916 |
| O61 | 3.9156113916 | 10.2633112363 | 7.8261300539  |
| C62 | 4.4766382145 | 11.3971477066 | 8.2813983339  |
| H63 | 4.5739160992 | 12.2308343674 | 7.5456665948  |
| H64 | 5.4507970690 | 11.2893465131 | 8.8189391424  |
| H65 | 3.8084383077 | 11.9646633613 | 9.1189749812  |

Name - INT-B3\\G=-1720.034790\\H=-1719.933573\\SCF E(PBE-D3/BS2)=-1720.55430384788\\ZeroPoint=347.603

| Atom | Angstroms     |               |               |
|------|---------------|---------------|---------------|
|      | x             | y             | z             |
| Fe1  | 2.3703263070  | 12.0641503215 | 10.6137698343 |
| O2   | 2.7144912083  | 14.7553403227 | 11.6110524478 |
| P3   | 0.7976381004  | 12.5687503931 | 9.1912082580  |
| N4   | 2.3210385624  | 10.1457373350 | 9.7032400075  |
| C5   | 1.0423849443  | 9.8443146211  | 9.0073671735  |
| H6   | 0.2895167273  | 9.6551530281  | 9.7906325644  |
| H7   | 1.1419992111  | 8.9205218693  | 8.4008469920  |
| C8   | 0.6201679162  | 11.0289405974 | 8.1406383569  |
| H9   | -0.4002724904 | 10.8932071511 | 7.7427727744  |
| H10  | 1.3026183921  | 11.1332591648 | 7.2780931168  |

|     |               |               |               |
|-----|---------------|---------------|---------------|
| P11 | 3.6999883983  | 11.1301371422 | 12.0651665560 |
| C12 | 0.9974440088  | 13.9543914323 | 7.9142750808  |
| H13 | 0.8765889975  | 14.8799705831 | 8.5097854482  |
| C14 | 2.4167435536  | 13.9509822419 | 7.3291832392  |
| H15 | 2.5884965633  | 13.0528093617 | 6.7079616836  |
| H16 | 3.1695622306  | 13.9494906489 | 8.1320004189  |
| H17 | 2.5677351731  | 14.8331474161 | 6.6815955155  |
| C18 | -0.0589269813 | 13.9405025414 | 6.7963089832  |
| H19 | 0.0972745780  | 14.7962031412 | 6.1153399907  |
| H20 | -1.0891543945 | 14.0107351190 | 7.1784792950  |
| H21 | 0.0150696351  | 13.0217321571 | 6.1895244194  |
| C22 | -0.9394571145 | 12.9178278377 | 9.8531819847  |
| H23 | -1.5570665340 | 13.2340571987 | 8.9919263124  |
| C24 | -0.8634067044 | 14.0615999558 | 10.8767640661 |
| H25 | -0.4364116618 | 14.9844790088 | 10.4488270689 |
| H26 | -0.2269267178 | 13.7555347577 | 11.7243651968 |
| H27 | -1.8709907197 | 14.3034612715 | 11.2601605170 |
| C28 | -1.5798140505 | 11.6723873877 | 10.4814647460 |
| H29 | -1.7594116639 | 10.8732377625 | 9.7425871142  |
| H30 | -2.555238556  | 11.9336749993 | 10.9293670026 |
| H31 | -0.9267215724 | 11.2739343010 | 11.2777119011 |
| C32 | 2.6852412349  | 9.0325199694  | 10.6194686738 |
| H33 | 2.8286759287  | 8.0932211121  | 10.0463909953 |
| H34 | 1.8297579743  | 8.8863603056  | 11.2999306162 |
| C35 | 3.9393376592  | 9.3906052861  | 11.4141435061 |
| H36 | 4.8221226689  | 9.4026001351  | 10.7497939021 |
| H37 | 4.1340334365  | 8.6537592974  | 12.2123246613 |
| C38 | 3.0879278950  | 10.9156941416 | 13.8418903390 |
| H39 | 3.9333100673  | 10.5138767829 | 14.4308527347 |
| C40 | 1.9161153536  | 9.9286270297  | 13.9334312998 |
| H41 | 1.0975657952  | 10.2531432776 | 13.2671184771 |
| H42 | 1.5297499269  | 9.8947211676  | 14.9681038307 |
| H43 | 2.2079854887  | 8.9015837384  | 13.6563646102 |
| H44 | 3.0605597177  | 10.2184847558 | 8.9829729946  |
| C45 | 2.6822445541  | 12.2893495766 | 14.3987837900 |
| H46 | 3.5119275525  | 13.0161809231 | 14.3785321313 |
| H47 | 2.3426903295  | 12.1955115773 | 15.4460256323 |
| H48 | 1.8561399339  | 12.7015696474 | 13.7948669432 |
| C49 | 5.4702925819  | 11.7419438256 | 12.3498187853 |
| H50 | 5.3367606641  | 12.6663578058 | 12.9441531477 |
| C51 | 6.1316075235  | 12.1259402825 | 11.0188066598 |
| H52 | 5.4929751076  | 12.8200229774 | 10.4514822285 |
| H53 | 6.2993928049  | 11.2351298168 | 10.3860934364 |
| H54 | 7.1165815698  | 12.5925700240 | 11.1996783420 |
| C55 | 6.3552629771  | 10.7646162662 | 13.1419558730 |
| H56 | 6.5025802566  | 9.8228854940  | 12.5868558180 |
| H57 | 5.9393091690  | 10.5124099999 | 14.1291707969 |
| H58 | 7.3535703877  | 11.2061138544 | 13.3098409380 |
| C59 | 2.5474189599  | 13.6392163859 | 11.2218912861 |
| H60 | 1.2091211204  | 11.5692192858 | 11.5371473308 |
| O61 | 4.4004481705  | 10.2014375278 | 7.4702237296  |
| C62 | 5.0098669365  | 11.2655181393 | 7.4013350973  |

|     |              |               |              |
|-----|--------------|---------------|--------------|
| H63 | 5.7570190601 | 11.4515261066 | 6.5919134608 |
| H64 | 4.8281125613 | 12.0788916685 | 8.1463055540 |
| H65 | 3.5170827461 | 12.3855328082 | 9.6271077341 |

**Name - TS-B1** \\G=-1720.033998 \\H=-1719.940682 \\SCF E (PBE-D3/BS2)=-1720.56137194968 \\ZeroPoint=348.079

| Atom | Angstroms     |               |               |
|------|---------------|---------------|---------------|
|      | x             | y             | z             |
| Fe1  | 2.4461259964  | 11.9125515354 | 10.4943575351 |
| O2   | 2.9517416211  | 14.6573754852 | 11.2494136057 |
| P3   | 0.8126071731  | 12.3972569683 | 9.1268278286  |
| N4   | 2.2569866109  | 9.9490028970  | 9.7729954721  |
| C5   | 0.9984464657  | 9.6602619925  | 9.0259529505  |
| H6   | 0.2095454560  | 9.4880779762  | 9.7756905145  |
| H7   | 1.1121424489  | 8.7257736234  | 8.4403385412  |
| C8   | 0.6194236869  | 10.8331077540 | 8.1199146539  |
| H9   | -0.3944811158 | 10.7034942810 | 7.7029327835  |
| H10  | 1.3206981392  | 10.9072000764 | 7.2685942109  |
| P11  | 3.6982646639  | 11.0238045022 | 12.0605974478 |
| C12  | 0.9123092332  | 13.7932350187 | 7.8530568663  |
| H13  | 0.6811990650  | 14.6942727048 | 8.4539788601  |
| C14  | 2.3306678942  | 13.9530459059 | 7.2900050839  |
| H15  | 2.5767850756  | 13.1259408334 | 6.6003370720  |
| H16  | 3.0813388808  | 13.9577925862 | 8.0953290078  |
| H17  | 2.4092617285  | 14.8923601937 | 6.7144076123  |
| C18  | -0.1220552112 | 13.6778495727 | 6.7203454551  |
| H19  | -0.0704701495 | 14.5694471500 | 6.0700005526  |
| H20  | -1.1578862918 | 13.5993226161 | 7.0885526834  |
| H21  | 0.0800449516  | 12.7966083254 | 6.0868806489  |
| C22  | -0.8870353054 | 12.7534315611 | 9.8765394142  |
| H23  | -1.5333666720 | 13.0958104718 | 9.0464170475  |
| C24  | -0.7514333462 | 13.8818235526 | 10.9120063353 |
| H25  | -0.3220295038 | 14.8034030995 | 10.4835226741 |
| H26  | -0.0919073605 | 13.5526362197 | 11.7330262302 |
| H27  | -1.7410516786 | 14.1368209609 | 11.3317728430 |
| C28  | -1.5268760628 | 11.5118032217 | 10.5122089902 |
| H29  | -1.7509262624 | 10.7263029043 | 9.7711924801  |
| H30  | -2.4800720270 | 11.7859477034 | 10.9989289470 |
| H31  | -0.8583862938 | 11.0903245827 | 11.2834692529 |
| C32  | 2.5042526366  | 8.8997968637  | 10.8021769803 |
| H33  | 2.5708610602  | 7.9026354564  | 10.3209288227 |
| H34  | 1.6352157148  | 8.8930852181  | 11.4802512728 |
| C35  | 3.7885798048  | 9.2252204276  | 11.5626385254 |
| H36  | 4.6542422550  | 9.1290051329  | 10.8831844595 |
| H37  | 3.9429332317  | 8.5411712827  | 12.4141284550 |

|     |              |               |               |
|-----|--------------|---------------|---------------|
| C38 | 3.0368185883 | 11.0420446802 | 13.8312868335 |
| H39 | 3.8600578369 | 10.6788227041 | 14.4754030099 |
| C40 | 1.8250774520 | 10.1193366267 | 14.0194461473 |
| H41 | 1.0135556261 | 10.4112963583 | 13.3299356275 |
| H42 | 1.4434924022 | 10.2030033595 | 15.0529308372 |
| H43 | 2.0702433902 | 9.0586004989  | 13.8430798955 |
| C44 | 2.6850756103 | 12.4853344512 | 14.2261088067 |
| H45 | 3.5385241876 | 13.1759775327 | 14.1169056913 |
| H46 | 2.3536403487 | 12.5247466748 | 15.2792567685 |
| H47 | 1.8677458707 | 12.8559330954 | 13.5846752682 |
| C48 | 5.5021154882 | 11.5081268681 | 12.3659749988 |
| H49 | 5.4254865549 | 12.4152508357 | 12.9965979686 |
| C50 | 6.2036307288 | 11.8910783393 | 11.0564197830 |
| H51 | 5.6568412209 | 12.6919946845 | 10.5363603872 |
| H52 | 6.2610355854 | 11.0275835365 | 10.3704048417 |
| H53 | 7.2343825595 | 12.2317251101 | 11.2604883874 |
| C54 | 6.3025304635 | 10.4403040038 | 13.1321804742 |
| H55 | 6.4426584966 | 9.5334205509  | 12.5187452085 |
| H56 | 5.8234852496 | 10.1371978098 | 14.0777285640 |
| H57 | 7.3070952949 | 10.8269930338 | 13.3803705234 |
| C58 | 2.7239592299 | 13.5243111547 | 10.9628796760 |
| H59 | 1.3130868100 | 11.6077777505 | 11.4921157739 |
| O60 | 4.7230832500 | 9.9417963416  | 8.3049762587  |
| C61 | 4.6320577903 | 11.1565806740 | 8.0306709852  |
| H62 | 3.0480182037 | 9.8721753349  | 9.1018385650  |
| H63 | 3.6296388738 | 12.1372362208 | 9.4566742623  |
| H64 | 3.8438949210 | 11.5431973640 | 7.3488198608  |
| H65 | 5.4422943319 | 11.8773727396 | 8.2758932263  |

**Name - INT-B5** \\G=-1853.796418 \\H=-1853.691016 \\SCF E (PBE-D3/BS2)=-1854.39626901779 \\ZeroPoint=395.399

| Atom | Angstroms     |               |               |
|------|---------------|---------------|---------------|
|      | x             | y             | z             |
| Fe1  | 1.9042939059  | 12.2798840868 | 10.8523861496 |
| O2   | 1.6282680169  | 14.8564781955 | 12.1762051324 |
| P3   | 0.1514946426  | 12.5460963818 | 9.5483054412  |
| N4   | 2.3960720571  | 10.8791086961 | 9.6671240627  |
| C5   | 1.4421253240  | 10.3016214904 | 8.6885962642  |
| H6   | 0.8643609606  | 9.4865321004  | 9.1725764152  |
| H7   | 2.0007001150  | 9.8289705782  | 7.8516453752  |
| C8   | 0.4979489766  | 11.3769283984 | 8.1409599314  |
| H9   | -0.4182348448 | 10.9481313716 | 7.7009355761  |
| H10  | 1.0142944320  | 11.9632496975 | 7.3624266166  |
| P11  | 3.4447168449  | 11.4822420023 | 12.2034242230 |
| C12  | -0.2064699838 | 14.2124654472 | 8.7468855087  |
| H13  | -0.6092824801 | 14.8272782073 | 9.5745971132  |

|     |               |               |               |
|-----|---------------|---------------|---------------|
| C14 | 1.1071573932  | 14.8540516880 | 8.2732582768  |
| H15 | 1.5819005804  | 14.2584690956 | 7.4748207862  |
| H16 | 1.8291946376  | 14.9323613198 | 9.1018769979  |
| H17 | 0.9163195111  | 15.8665888241 | 7.8762925176  |
| C18 | -1.2450612142 | 14.1489229862 | 7.6154928183  |
| H19 | -1.4319422636 | 15.1627211613 | 7.2184065539  |
| H20 | -2.2134587314 | 13.7418770639 | 7.9490069660  |
| H21 | -0.8838599261 | 13.5284742753 | 6.7768159421  |
| C22 | -1.5190281202 | 12.0280657805 | 10.2423586971 |
| H23 | -2.2584419247 | 12.1991346079 | 9.4368193511  |
| C24 | -1.8822570289 | 12.8951391436 | 11.4586034607 |
| H25 | -1.9348372713 | 13.9685117190 | 11.2115890835 |
| H26 | -1.1308185630 | 12.7674605706 | 12.2569751118 |
| H27 | -2.8670775500 | 12.5950461304 | 11.8587432618 |
| C28 | -1.5240289591 | 10.5350569840 | 10.6056191529 |
| H29 | -1.3796165219 | 9.8886321051  | 9.7246073648  |
| H30 | -2.4907759670 | 10.2608611440 | 11.0644046986 |
| H31 | -0.7246766581 | 10.3120539859 | 11.3331939300 |
| C32 | 3.3818589418  | 9.8330997471  | 10.0205500106 |
| H33 | 3.9283848809  | 9.5118405838  | 9.1071773358  |
| H34 | 2.8499741399  | 8.9304515977  | 10.3887776369 |
| C35 | 4.3728963122  | 10.3214822223 | 11.0812907757 |
| H36 | 5.1675225191  | 10.9261180084 | 10.6116546609 |
| H37 | 4.8558549534  | 9.4858700442  | 11.6164994579 |
| C38 | 2.8222142404  | 10.4354893874 | 13.6427161107 |
| H39 | 3.7196537654  | 10.0953447536 | 14.1937376381 |
| C40 | 2.0569274899  | 9.2013804664  | 13.1411557633 |
| H41 | 1.2390545501  | 9.5016879518  | 12.4636195118 |
| H42 | 1.6131852605  | 8.6580707243  | 13.9945350749 |
| H43 | 2.7112205331  | 8.4962898373  | 12.6035144600 |
| H44 | 0.9437592292  | 11.7722473654 | 11.8385880220 |
| C45 | 1.9504947149  | 11.2849165825 | 14.5820986472 |
| H46 | 2.4870597741  | 12.1614618003 | 14.9823225462 |
| H47 | 1.6155425175  | 10.6769786164 | 15.4411654559 |
| H48 | 1.0582880641  | 11.6521394104 | 14.0466356093 |
| C49 | 4.7640552458  | 12.5473034446 | 13.0328575311 |
| H50 | 4.2308023168  | 13.0021179185 | 13.8899352126 |
| C51 | 5.2297140704  | 13.6811544694 | 12.1080485774 |
| H52 | 4.3829257343  | 14.2769837236 | 11.7347962855 |
| H53 | 5.7745470612  | 13.2862923267 | 11.2337084553 |
| H54 | 5.9192636985  | 14.3541482832 | 12.6481738718 |
| C55 | 5.9576135751  | 11.7377813860 | 13.5689633031 |
| H56 | 6.5321666793  | 11.2815369769 | 12.7439076329 |
| H57 | 5.6550603265  | 10.9327660146 | 14.2586441764 |
| H58 | 6.6458988619  | 12.4032087045 | 14.1203462277 |
| C59 | 1.7459273570  | 13.8036239352 | 11.6319760363 |
| O60 | 3.5719870286  | 12.3533783829 | 7.6243298554  |
| C61 | 4.2923516975  | 13.4373486243 | 8.1652927731  |
| H62 | 3.1828869853  | 11.8640491889 | 8.4199187181  |
| N63 | 5.6984322586  | 13.3871483396 | 7.7519741887  |
| C64 | 6.3908982383  | 12.2066906349 | 8.2591698357  |
| C65 | 6.4016170769  | 14.6186832969 | 8.1007661067  |

|     |              |               |              |
|-----|--------------|---------------|--------------|
| H66 | 4.1574187893 | 13.4354924113 | 9.2850622674 |
| H67 | 3.8910948771 | 14.4013795288 | 7.7917312228 |
| H68 | 5.8655444263 | 15.4894417968 | 7.6857107267 |
| H69 | 7.4185846049 | 14.6062657406 | 7.6723507098 |
| H70 | 6.5029553460 | 14.7757061049 | 9.2016213983 |
| H71 | 7.3732381339 | 12.0983164778 | 7.7682640392 |
| H72 | 5.7874655780 | 11.3144269513 | 8.0313136462 |
| H73 | 6.5673984601 | 12.2413775204 | 9.3617349472 |

**Name - INT-B6** \\G=-1853.788387 \\H=-1853.685443 \\SCF E(PBE-D3/BS2)=-  
1854.39162675521 \\ZeroPoint=396.068

| Angstroms |               |               |               |
|-----------|---------------|---------------|---------------|
| Atom      | x             | y             | z             |
| Fe1       | 2.1442103242  | 12.4010415993 | 10.6712552727 |
| O2        | 1.8867649656  | 14.9062159704 | 12.1107876322 |
| P3        | 0.2778632917  | 12.6160396247 | 9.4844658753  |
| N4        | 2.4948961132  | 10.7370825836 | 9.4996257264  |
| C5        | 1.2891341249  | 10.1420309041 | 8.8585964946  |
| H6        | 0.7209979064  | 9.5924499550  | 9.6282950669  |
| H7        | 1.5994295502  | 9.4105019525  | 8.0844067324  |
| C8        | 0.4402763046  | 11.2474001909 | 8.2276315889  |
| H9        | -0.5294535079 | 10.8669065714 | 7.8653282574  |
| H10       | 0.9969013549  | 11.6807358391 | 7.3782978870  |
| P11       | 3.5232909922  | 11.4480398284 | 12.1026758250 |
| C12       | -0.2889696325 | 14.1394473181 | 8.5098303238  |
| H13       | -0.8069221630 | 14.7463446255 | 9.2771888625  |
| C14       | 0.8861398681  | 14.9616036497 | 7.9704101476  |
| H15       | 1.4171183863  | 14.4124043991 | 7.1746034072  |
| H16       | 1.6097055498  | 15.1951588333 | 8.7683776511  |
| H17       | 0.5245495761  | 15.9111240788 | 7.5374418426  |
| C18       | -1.2860331137 | 13.8032878899 | 7.3867138034  |
| H19       | -1.6781940150 | 14.7357169170 | 6.9426413541  |
| H20       | -2.1513908549 | 13.2161266982 | 7.7361121795  |
| H21       | -0.7944800943 | 13.2347729559 | 6.5785407592  |
| C22       | -1.3325309734 | 12.2751350419 | 10.4210649540 |
| H23       | -2.1428394699 | 12.5306501396 | 9.7120460814  |
| C24       | -1.4331638753 | 13.2008485141 | 11.6444356213 |
| H25       | -1.3434094990 | 14.2685550472 | 11.3816686401 |
| H26       | -0.6310531164 | 12.9653859066 | 12.3635628978 |
| H27       | -2.4059255385 | 13.0610465242 | 12.1485566164 |
| C28       | -1.5037951984 | 10.8075221388 | 10.8343533903 |
| H29       | -1.5211255780 | 10.1237214817 | 9.9699093244  |
| H30       | -2.4570022902 | 10.6792361039 | 11.3781674005 |
| H31       | -0.6883915414 | 10.4957614378 | 11.5094791684 |
| C32       | 3.3696769547  | 9.6459878933  | 10.0249608776 |
| H33       | 3.8971663570  | 9.1651825956  | 9.1773430705  |
| H34       | 2.7225979653  | 8.8779281634  | 10.4802987856 |
| C35       | 4.3765367735  | 10.1565624416 | 11.0609770500 |



|     |              |               |               |
|-----|--------------|---------------|---------------|
| H36 | 5.2150257920 | 10.6722470469 | 10.5639090327 |
| H37 | 4.7958859494 | 9.3249756530  | 11.6535920314 |
| C38 | 2.7106184648 | 10.5022232215 | 13.5315198196 |
| H39 | 3.5425266039 | 10.1779359475 | 14.1850526335 |
| C40 | 1.9439911253 | 9.2533841814  | 13.0752747068 |
| H41 | 1.1893520908 | 9.5129342158  | 12.3131815082 |
| H42 | 1.4149653692 | 8.8002625686  | 13.9328731908 |
| H43 | 2.6120176753 | 8.4826900495  | 12.6570224820 |
| H44 | 1.1663845129 | 11.6778203890 | 11.5297921679 |
| C45 | 1.7927330581 | 11.4448469848 | 14.3271246401 |
| H46 | 2.3179157193 | 12.3414637184 | 14.6977265382 |
| H47 | 1.3743651928 | 10.9176733655 | 15.2030738512 |
| H48 | 0.9578585282 | 11.7845626891 | 13.6912811173 |
| C49 | 4.8889412519 | 12.3071017407 | 13.0966900577 |
| H50 | 4.3448854724 | 12.6866956581 | 13.9828306809 |
| C51 | 5.4828039358 | 13.5136987626 | 12.3630899088 |
| H52 | 4.6970575661 | 14.1992287332 | 12.0107548045 |
| H53 | 6.0698399967 | 13.1964150324 | 11.4859526131 |
| H54 | 6.1622611905 | 14.0711587580 | 13.0323424241 |
| C55 | 5.9958038849 | 11.3465062424 | 13.5668517228 |
| H56 | 6.5825596088 | 10.9694037881 | 12.7113026013 |
| H57 | 5.6062602049 | 10.4749596116 | 14.1186774463 |
| H58 | 6.6940401030 | 11.8770343573 | 14.2388004827 |
| C59 | 1.9868422808 | 13.8793363934 | 11.5189971127 |
| O60 | 3.5760209416 | 12.0230158517 | 7.5438785247  |
| C61 | 3.8410688544 | 13.1590777669 | 8.1654531212  |
| H62 | 3.0258015267 | 11.2198618291 | 8.6617138726  |
| N63 | 5.2296975840 | 13.5531128733 | 8.2389162578  |
| C64 | 6.1962671820 | 12.5161099458 | 8.5353112957  |
| C65 | 5.4859360022 | 14.8542519221 | 8.8263083953  |
| H66 | 3.3750443192 | 13.1079469569 | 9.3826115188  |
| H67 | 3.2835818239 | 14.0604338673 | 7.8324852566  |
| H68 | 4.7272856867 | 15.5737377522 | 8.4710662987  |
| H69 | 6.4812839815 | 15.2243573340 | 8.5216835127  |
| H70 | 5.4457751010 | 14.8496949003 | 9.9364894996  |
| H71 | 7.1728236199 | 12.7473963814 | 8.0725600024  |
| H72 | 5.8156908879 | 11.5751832305 | 8.1084225354  |
| H73 | 6.3645672024 | 12.3689562430 | 9.6261746073  |

**Name** - INT-B7\\G=-1853.815261\\H=-1853.709664\\SCF E(PBE-D3/BS2)=-1854.41132296606 \\ZeroPoint=393.849

| Atom | Angstroms    |               |               |
|------|--------------|---------------|---------------|
|      | x            | y             | z             |
| Fe1  | 1.6487527422 | 12.3192699247 | 11.1490282748 |
| O2   | 0.6727081367 | 14.3717880957 | 12.9355185887 |

|     |               |               |               |
|-----|---------------|---------------|---------------|
| P3  | 0.1545929912  | 12.6601155573 | 9.6004650362  |
| N4  | 2.5300237165  | 10.9923987879 | 9.7376465778  |
| C5  | 1.5731640646  | 10.4890919270 | 8.7189766257  |
| H6  | 0.9079845626  | 9.7690735319  | 9.2242121930  |
| H7  | 2.1161772332  | 9.9485792372  | 7.9161282532  |
| C8  | 0.7664387998  | 11.6529490484 | 8.1464428560  |
| H9  | -0.0471578050 | 11.2999335306 | 7.4897431943  |
| H10 | 1.4244895679  | 12.3059190507 | 7.5454996836  |
| P11 | 3.1371128241  | 11.5320306705 | 12.5305630772 |
| C12 | -0.1434038330 | 14.3782850977 | 8.8584382054  |
| H13 | -0.7115391469 | 14.9097217543 | 9.6474219309  |
| C14 | 1.1872428208  | 15.1181903557 | 8.6520934502  |
| H15 | 1.7953562015  | 14.6343499842 | 7.8647543174  |
| H16 | 1.7860209542  | 15.1147662946 | 9.5768779229  |
| H17 | 1.0006194403  | 16.1598139208 | 8.3341200947  |
| C18 | -0.9767569673 | 14.3712736621 | 7.5641254389  |
| H19 | -1.1515912724 | 15.4069443702 | 7.2204725644  |
| H20 | -1.9643712061 | 13.8974850688 | 7.6902024955  |
| H21 | -0.4485663948 | 13.8400816944 | 6.7515592911  |
| C22 | -1.6161359457 | 12.0664860871 | 9.9022043982  |
| H23 | -2.2266559177 | 12.4173095085 | 9.0491299499  |
| C24 | -2.1421980565 | 12.6957400198 | 11.2018159991 |
| H25 | -2.1204561295 | 13.7985842195 | 11.1774999515 |
| H26 | -1.5196020283 | 12.3636225950 | 12.0500648983 |
| H27 | -3.1862116461 | 12.3836157560 | 11.3852056359 |
| C28 | -1.7062929616 | 10.5355240295 | 9.9697045968  |
| H29 | -1.4506882162 | 10.0559972786 | 9.0098381508  |
| H30 | -2.7353490354 | 10.2276048464 | 10.2291361012 |
| H31 | -1.0217992706 | 10.1521021306 | 10.7469245639 |
| C32 | 3.2641904942  | 9.8623863353  | 10.3630575272 |
| H33 | 3.8495815728  | 9.3141087735  | 9.5961196963  |
| H34 | 2.5092881746  | 9.1709934665  | 10.7731549454 |
| C35 | 4.1721683272  | 10.3837498562 | 11.4756429356 |
| H36 | 4.9911532782  | 10.9842057220 | 11.0404925354 |
| H37 | 4.6278944054  | 9.5581478624  | 12.0489662167 |
| C38 | 2.5518643226  | 10.4770838372 | 13.9884360265 |
| H39 | 3.4383361436  | 10.2682179944 | 14.6160435368 |
| C40 | 1.9527228670  | 9.1405979195  | 13.5293654626 |
| H41 | 1.1290423308  | 9.3225906322  | 12.8167461041 |
| H42 | 1.5468146316  | 8.5895386580  | 14.3968512212 |
| H43 | 2.6987898399  | 8.4890039259  | 13.0443361918 |
| H44 | 0.7542442663  | 11.1111348002 | 11.5918738926 |
| C45 | 1.5233580291  | 11.2765708527 | 14.8037344736 |
| H46 | 1.9299774626  | 12.2305806903 | 15.1801262185 |
| H47 | 1.1821244277  | 10.6892114450 | 15.6753746357 |
| H48 | 0.6509547291  | 11.5074313672 | 14.1689726850 |
| C49 | 4.4177277869  | 12.6480645217 | 13.3710532011 |
| H50 | 3.8393721195  | 13.1527695546 | 14.1695424635 |
| C51 | 4.9255614865  | 13.7249269445 | 12.4012342109 |
| C52 | 5.5915986176  | 11.8874214436 | 14.0122947702 |
| H53 | 6.1898140404  | 11.3611749131 | 13.2475109946 |
| H54 | 5.2663447177  | 11.1430620143 | 14.7569783110 |

|     |              |               |               |
|-----|--------------|---------------|---------------|
| H55 | 6.2663000001 | 12.5942992835 | 14.5280254825 |
| C56 | 1.0533640902 | 13.5017561149 | 12.2113895893 |
| O57 | 4.6482414326 | 12.3556150989 | 8.1822237011  |
| C58 | 4.7680362499 | 13.5184810033 | 8.6293689486  |
| H59 | 3.2348929655 | 11.5640917957 | 9.2310725909  |
| N60 | 5.7337051202 | 14.3972877640 | 8.2605601394  |
| C61 | 6.7455789153 | 14.0345796295 | 7.2747510563  |
| C62 | 5.8071608054 | 15.7300151457 | 8.8470581634  |
| H63 | 2.6067852691 | 13.3907705198 | 10.5883869850 |
| H64 | 4.0597824186 | 13.9125290168 | 9.3917291571  |
| H65 | 6.7086737774 | 14.7242221046 | 6.4127987330  |
| H66 | 6.5437830165 | 13.0097498626 | 6.9329434371  |
| H67 | 7.7550672525 | 14.0807998644 | 7.7208219173  |
| H68 | 4.9895009488 | 15.8620500940 | 9.5733106707  |
| H69 | 5.7159909020 | 16.5070760834 | 8.0665854786  |
| H70 | 6.7701489584 | 15.8718073754 | 9.3704660637  |
| H71 | 5.5272288755 | 13.2783612591 | 11.5882822667 |
| H72 | 5.5719645033 | 14.4462728431 | 12.9327695665 |
| H73 | 4.0841610894 | 14.2582088907 | 11.9320665448 |

**Name - TS-B2** \\G=-1853.785418 \\H=-1853.683639 \\SCF E(PBE-D3/BS2)=-1854.39133249392 \\ZeroPoint=397.468

| Angstroms |               |               |               |
|-----------|---------------|---------------|---------------|
| Atom      | x             | y             | z             |
| Fe1       | 2.1024308887  | 12.3540287387 | 10.7024982779 |
| O2        | 1.8126643527  | 14.8603540713 | 12.1259443503 |
| P3        | 0.2927511368  | 12.6146937975 | 9.4734790676  |
| N4        | 2.4352627382  | 10.6223748884 | 9.5253817219  |
| C5        | 1.2509658003  | 10.1342090984 | 8.7679104847  |
| H6        | 0.6040377319  | 9.5791548894  | 9.4672373715  |
| H7        | 1.5746025972  | 9.4260529880  | 7.9776979276  |
| C8        | 0.4999962495  | 11.3155761393 | 8.1466796937  |
| H9        | -0.4520267397 | 10.9981150989 | 7.6877916817  |
| H10       | 1.1322164630  | 11.7689899435 | 7.3628104865  |
| P11       | 3.5147130748  | 11.4330704487 | 12.1239515289 |
| C12       | -0.1980138253 | 14.2099829392 | 8.5746553791  |
| H13       | -0.7617548900 | 14.7569023252 | 9.3552489283  |
| C14       | 1.0071858430  | 15.0723312514 | 8.1788162996  |
| H15       | 1.5132659924  | 14.6560093040 | 7.2912140348  |
| H16       | 1.7437351315  | 15.1363883034 | 8.9957684638  |
| H17       | 0.6777217738  | 16.0925675976 | 7.9150275466  |
| C18       | -1.1306855077 | 13.9715942026 | 7.3741273784  |
| H19       | -1.4793431423 | 14.9381310773 | 6.9682954556  |
| H20       | -2.0252776331 | 13.3817163052 | 7.6341647687  |
| H21       | -0.6019733086 | 13.4446159746 | 6.5610750381  |
| C22       | -1.3665025074 | 12.2534310879 | 10.3135911040 |
| H23       | -2.1435287661 | 12.5709961829 | 9.5922987160  |

|     |               |               |               |
|-----|---------------|---------------|---------------|
| C24 | -1.4913172687 | 13.1029174397 | 11.5895190042 |
| H25 | -1.3611265913 | 14.1819006512 | 11.4002857444 |
| H26 | -0.7219448523 | 12.7971050336 | 12.3180999091 |
| H27 | -2.4865814259 | 12.9604804606 | 12.0469180344 |
| C28 | -1.5785993504 | 10.7677300943 | 10.6323018901 |
| H29 | -1.6077388230 | 10.1413039207 | 9.7255593717  |
| H30 | -2.5392580440 | 10.6298177630 | 11.1605221474 |
| H31 | -0.7749920776 | 10.3955655669 | 11.2916346208 |
| C32 | 3.1351269961  | 9.4956344244  | 10.1966015856 |
| H33 | 3.5688280411  | 8.8147329728  | 9.4357379584  |
| H34 | 2.3839955821  | 8.9193603069  | 10.7614460121 |
| C35 | 4.2302402791  | 10.0135043473 | 11.1336446852 |
| H36 | 5.0628681711  | 10.4287494668 | 10.5403768464 |
| H37 | 4.6345880583  | 9.2018487046  | 11.7630706444 |
| C38 | 2.7637693602  | 10.6289879557 | 13.6713000738 |
| H39 | 3.6303859037  | 10.3347404705 | 14.2958836889 |
| C40 | 1.9247474911  | 9.3777844980  | 13.3843567784 |
| H41 | 1.1065360559  | 9.6130412207  | 12.6813597636 |
| H42 | 1.4680576209  | 9.0080029492  | 14.3201619601 |
| H43 | 2.5254786001  | 8.5545040008  | 12.9639730010 |
| H44 | 1.1176782303  | 11.5886714397 | 11.5638897467 |
| C45 | 1.9272414958  | 11.6745880680 | 14.4281248571 |
| H46 | 2.4974958865  | 12.5877771618 | 14.6705633764 |
| H47 | 1.5524472195  | 11.2518429516 | 15.3771980607 |
| H48 | 1.0642514552  | 11.9762456711 | 13.8105718238 |
| C49 | 4.9812531501  | 12.2719419425 | 13.0072985534 |
| H50 | 4.5635918124  | 12.4774720548 | 14.0112298917 |
| C51 | 5.3886819651  | 13.6186901776 | 12.4018971886 |
| H52 | 4.5216840088  | 14.2840133331 | 12.2733884206 |
| H53 | 5.8618608579  | 13.4924264056 | 11.4170577134 |
| H54 | 6.1196150080  | 14.1214143264 | 13.0608255271 |
| C55 | 6.1890997551  | 11.3361423829 | 13.1820628837 |
| H56 | 6.6697457191  | 11.1136354268 | 12.2133473811 |
| H57 | 5.9167198444  | 10.3764516011 | 13.6533265625 |
| H58 | 6.9489244846  | 11.8169464173 | 13.8237202945 |
| C59 | 1.9334760111  | 13.8284463448 | 11.5425524636 |
| O60 | 3.8594502786  | 11.7655815024 | 7.5777211656  |
| C61 | 3.9274417072  | 12.9755839046 | 8.0170983725  |
| H62 | 3.0907201421  | 11.0212643511 | 8.7866931064  |
| N63 | 5.1847115579  | 13.5843869888 | 8.2388758460  |
| C64 | 6.2537984713  | 12.7013287788 | 8.6773604827  |
| C65 | 5.1266767872  | 14.9007893515 | 8.8603354873  |
| H66 | 3.2961802989  | 13.0284542157 | 9.4394073171  |
| H67 | 3.2101049550  | 13.7364252216 | 7.6464430059  |
| H68 | 4.4346310663  | 15.5474435652 | 8.2937586938  |
| H69 | 6.1232902166  | 15.3706469534 | 8.8472099065  |
| H70 | 4.7600174663  | 14.8461450487 | 9.9068021031  |
| H71 | 7.2275864782  | 13.2069769204 | 8.5720027474  |
| H72 | 6.2379628935  | 11.7956759285 | 8.0532123100  |
| H73 | 6.1325901253  | 12.3878501294 | 9.7368836911  |

Name - INT-A7\\G=-1605.663588\\H=-1605.574865\\SCF E(PBE-D3/BS2)=-  
1606.15780794580\\ZeroPoint=330.866

| Atom | Angstroms     |               |               |
|------|---------------|---------------|---------------|
|      | x             | y             | z             |
| Fe1  | 1.9351556916  | 11.8126370711 | 10.9414992632 |
| O2   | -0.2509695210 | 11.4564915042 | 12.8433464634 |
| P3   | 0.8040390815  | 12.5252164983 | 9.2197275885  |
| N4   | 2.1262683322  | 10.0127023156 | 9.8750071321  |
| C5   | 0.9588019770  | 9.7780110618  | 8.9853919837  |
| H6   | 0.0870311728  | 9.6176609002  | 9.6421562873  |
| H7   | 1.1060484210  | 8.8639525546  | 8.3738088619  |
| C8   | 0.7505054143  | 11.0102878486 | 8.0972935650  |
| H9   | -0.1889167423 | 10.9372210652 | 7.5237614979  |
| H10  | 1.5744117130  | 11.0873893625 | 7.3654080618  |
| P11  | 3.6163949857  | 11.0320884843 | 12.0957064578 |
| C12  | 1.4946493216  | 13.9077303604 | 8.1140756500  |
| H13  | 1.5810248425  | 14.7614395846 | 8.8135126125  |
| C14  | 2.9063427370  | 13.5800502212 | 7.6044984130  |
| H15  | 2.8896679399  | 12.7707897692 | 6.8518088939  |
| H16  | 3.5657492671  | 13.2693277113 | 8.4297486160  |
| H17  | 3.3466815607  | 14.4690629992 | 7.1193345197  |
| C18  | 0.5835151763  | 14.3075868869 | 6.9391612442  |
| H19  | 1.0952780224  | 15.0533030574 | 6.3047053764  |
| H20  | -0.3656242851 | 14.7595183745 | 7.2675354345  |
| H21  | 0.3464001212  | 13.4397806728 | 6.2974925902  |
| C22  | -1.0125983502 | 13.0236326171 | 9.3626857247  |
| H23  | -1.3382941777 | 13.3148637134 | 8.3475948155  |
| C24  | -1.1305226005 | 14.2352152824 | 10.3008280172 |
| H25  | -0.5545978100 | 15.1018762509 | 9.9341912882  |
| H26  | -0.7522672431 | 13.9799268478 | 11.3048891312 |
| H27  | -2.1853565574 | 14.5494197154 | 10.3968356961 |
| C28  | -1.9095548390 | 11.8649878224 | 9.8236888308  |
| H29  | -1.8864987891 | 11.0139397510 | 9.1224961857  |
| H30  | -2.9572944382 | 12.2115752102 | 9.8822693403  |
| H31  | -1.6208353987 | 11.5006441142 | 10.8203915731 |
| C32  | 2.4026412407  | 8.8866331194  | 10.8075513063 |
| H33  | 2.5154762764  | 7.9320850596  | 10.2531512009 |
| H34  | 1.5209165406  | 8.8058475036  | 11.4651355623 |
| C35  | 3.6603907378  | 9.1979289519  | 11.6295641268 |
| H36  | 4.5687601411  | 8.9965571004  | 11.0356500919 |
| H37  | 3.7149564212  | 8.5540511112  | 12.5227508700 |
| C38  | 3.6673345654  | 11.0228130053 | 13.9801764631 |
| H39  | 4.5902411502  | 10.4826185516 | 14.2626887298 |
| C40  | 2.4711161428  | 10.2810580371 | 14.5938016549 |
| H41  | 1.5269319204  | 10.8060299261 | 14.3883031331 |
| H42  | 2.5967279175  | 10.2217794645 | 15.6900845225 |
| H43  | 2.3732775356  | 9.2487700630  | 14.2163083811 |
| H44  | 2.9512471431  | 10.1209110108 | 9.2657905137  |
| C45  | 3.7440861162  | 12.4694942076 | 14.4939248812 |

|     |              |               |               |
|-----|--------------|---------------|---------------|
| H46 | 4.6468805110 | 12.9931466580 | 14.1378195012 |
| H47 | 3.7597186646 | 12.4869263496 | 15.5981312281 |
| H48 | 2.8651087897 | 13.0418695115 | 14.1510266805 |
| C49 | 5.3676189107 | 11.6258003622 | 11.6533091887 |
| H50 | 5.3021125572 | 12.7189566988 | 11.8112686916 |
| C51 | 5.6728696870 | 11.3876549986 | 10.1654607751 |
| H52 | 4.8362184963 | 11.7233285231 | 9.5308636921  |
| H53 | 5.8683838943 | 10.3209394852 | 9.9533258879  |
| H54 | 6.5766964854 | 11.9481820676 | 9.8687478918  |
| C55 | 6.4916976043 | 11.0489473697 | 12.5296979279 |
| H56 | 6.5016850024 | 9.9443949574  | 12.4974172940 |
| H57 | 6.4135260222 | 11.3582627249 | 13.5837963188 |
| H58 | 7.4733574640 | 11.3950441259 | 12.1592901818 |
| C59 | 0.6370009928 | 11.5127794370 | 12.0425909605 |
| H60 | 3.0665123124 | 12.4532596053 | 10.1337056075 |
| H61 | 2.0150466853 | 13.1845600269 | 11.5644296453 |

**Name - INT-B4** \\G=-1605.674657 \\H=-1605.576888 \\SCF E(PBE-D3/BS1)=-1606.13431920953 \\ZeroPoint=330.258

| Atom | Angstroms     |               |               |
|------|---------------|---------------|---------------|
|      | x             | y             | z             |
| Fe1  | 2.3479418966  | 11.9555835563 | 10.6074675387 |
| P2   | 0.7544336138  | 12.5032346231 | 9.2282207901  |
| N3   | 2.1390725630  | 10.0018169199 | 9.7928716043  |
| C4   | 0.8110152255  | 9.7604908556  | 9.1632023457  |
| H5   | 0.0904328341  | 9.6602837531  | 9.9916644838  |
| H6   | 0.8185166954  | 8.8051228716  | 8.5999227223  |
| C7   | 0.4196101816  | 10.9318847375 | 8.2640421977  |
| H8   | -0.6311807276 | 10.8467195495 | 7.9373268855  |
| H9   | 1.0491528128  | 10.9479151932 | 7.3571901059  |
| P10  | 3.6561396733  | 11.0095287181 | 12.0684972073 |
| C11  | 1.0367559775  | 13.8166705003 | 7.8932966765  |
| H12  | 1.2169629025  | 14.7381057049 | 8.4804098927  |
| C13  | 2.3190642452  | 13.5064939661 | 7.1061800565  |
| H14  | 2.1727873395  | 12.6508450126 | 6.4222378485  |
| H15  | 3.1441777375  | 13.2575675633 | 7.7933370201  |
| H16  | 2.6074444078  | 14.3745394679 | 6.4874316126  |
| C17  | -0.1544786428 | 14.0483318826 | 6.9487633808  |
| H18  | 0.1172031542  | 14.7833788904 | 6.1698547324  |
| H19  | -1.0427713825 | 14.4394522497 | 7.4698221093  |
| H20  | -0.4449991932 | 13.1157442787 | 6.4326725778  |
| C21  | -0.9329080353 | 12.9944338802 | 9.9236147248  |
| H22  | -1.5800626205 | 13.2239366604 | 9.0573555721  |
| C23  | -0.7703842906 | 14.2507892896 | 10.7930405015 |
| H24  | -0.3547314138 | 15.1030049943 | 10.2292467011 |
| H25  | -0.0897363676 | 14.0368601593 | 11.6340633491 |
| H26  | -1.7461435667 | 14.5643506007 | 11.2048004651 |
| C27  | -1.5828101627 | 11.8575344726 | 10.7241119067 |
| H28  | -1.8358983477 | 10.9901969759 | 10.0909073464 |
| H29  | -2.5203157160 | 12.2119084432 | 11.1894405408 |
| H30  | -0.9003233635 | 11.5196109186 | 11.5233554084 |

|     |              |               |               |
|-----|--------------|---------------|---------------|
| C31 | 2.4546801808 | 8.9157251228  | 10.7622088720 |
| H32 | 2.5135693809 | 7.9387535370  | 10.2406524088 |
| H33 | 1.6068298154 | 8.8741471081  | 11.4659161338 |
| C34 | 3.7486998890 | 9.2220964306  | 11.5142978795 |
| H35 | 4.6183640265 | 9.1192351432  | 10.8420052214 |
| H36 | 3.8935473603 | 8.5209613477  | 12.3543485847 |
| C37 | 3.0993968022 | 10.9133195045 | 13.8721734944 |
| H38 | 3.9039807748 | 10.3974430339 | 14.4273248666 |
| C39 | 1.8053908791 | 10.1047084425 | 14.0362800098 |
| H40 | 1.0136477221 | 10.5233238236 | 13.3906871644 |
| H41 | 1.4631888653 | 10.1490768155 | 15.0861222850 |
| H42 | 1.9404707348 | 9.0407068700  | 13.7779248116 |
| H43 | 2.8527916429 | 9.9851330066  | 9.0509230223  |
| C44 | 2.9261615412 | 12.3380713145 | 14.4203577987 |
| H45 | 3.8576380002 | 12.9264019850 | 14.3665832648 |
| H46 | 2.6076145544 | 12.3092525452 | 15.4778284399 |
| H47 | 2.1552159437 | 12.8701040749 | 13.8381512475 |
| C48 | 5.4670492854 | 11.5389283145 | 12.2344557641 |
| H49 | 5.3931662265 | 12.5886596458 | 12.5794511786 |
| C50 | 6.1467685348 | 11.5468893160 | 10.8571462034 |
| H51 | 5.5102012924 | 12.0543002960 | 10.1141880231 |
| H52 | 6.3375419249 | 10.5187243147 | 10.4993914983 |
| H53 | 7.1225914533 | 12.0607531425 | 10.9149275194 |
| C54 | 6.2869128753 | 10.7321365311 | 13.2546833526 |
| H55 | 6.2817884722 | 9.6546561105  | 13.0110578761 |
| H56 | 5.9186226076 | 10.8492071474 | 14.2860549904 |
| H57 | 7.3399240411 | 11.0661209782 | 13.2437874618 |
| H58 | 1.1972078453 | 11.5821316234 | 11.5874096472 |
| H59 | 3.4769764610 | 12.1402236489 | 9.5541587597  |
| C60 | 2.6467540673 | 13.5393372290 | 11.1365043329 |
| O61 | 2.8918900966 | 14.6567753726 | 11.4751168549 |

**Name - Trans-DhB**\\G=-1721.223011\\H=-1721.129702\\SCF E(PBE-D3/BS1)=-1721.74362825560\\ZeroPoint=363.188

| Atom | Angstroms     |               |               |
|------|---------------|---------------|---------------|
|      | x             | y             | z             |
| Fe1  | 2.4150372399  | 11.8882649760 | 10.5695998039 |
| P2   | 0.8071238097  | 12.4290343923 | 9.1927843823  |
| N3   | 2.1015587779  | 9.9002658568  | 9.8921383179  |
| C4   | 0.7558336839  | 9.6870068193  | 9.2933065802  |
| H5   | 0.0307029673  | 9.6724432786  | 10.1235775002 |
| H6   | 0.7137529038  | 8.7014277697  | 8.7855949048  |
| C7   | 0.4352186199  | 10.8187651671 | 8.3163094365  |
| H8   | -0.6010692661 | 10.7516518350 | 7.9438161014  |
| H9   | 1.1144094606  | 10.7649594695 | 7.4474358850  |
| P10  | 3.6911233613  | 10.9777382384 | 12.0899447339 |
| C11  | 1.0297457214  | 13.6946853959 | 7.8021872285  |
| H12  | 0.8050990704  | 14.6589916865 | 8.2985399594  |
| C13  | 2.4798165969  | 13.7428257634 | 7.3017197340  |

|     |               |               |               |
|-----|---------------|---------------|---------------|
| H14 | 2.7778011566  | 12.7871123122 | 6.8369153143  |
| H15 | 3.1767224014  | 13.9273310447 | 8.1332843136  |
| H16 | 2.5946243881  | 14.5426458190 | 6.5483151722  |
| C17 | 0.0402222845  | 13.5019909338 | 6.6397947504  |
| H18 | 0.1222240448  | 14.3435347780 | 5.9288901159  |
| H19 | -1.0096513597 | 13.4525845513 | 6.9740978917  |
| H20 | 0.2597589745  | 12.5769157240 | 6.0790566901  |
| C21 | -0.8380257694 | 13.0203526920 | 9.9131438614  |
| H22 | -1.4409943651 | 13.3825771343 | 9.0582164232  |
| C23 | -0.5746871555 | 14.1876519925 | 10.8784872001 |
| H24 | -0.0364201996 | 15.0233030189 | 10.3992684232 |
| H25 | 0.0379938280  | 13.8342507173 | 11.7253065022 |
| H26 | -1.5285619457 | 14.5836692894 | 11.2708380328 |
| C27 | -1.6093631406 | 11.8997824288 | 10.6235411080 |
| H28 | -1.9064092746 | 11.0893256649 | 9.9369977156  |
| H29 | -2.5326151940 | 12.3039496578 | 11.0763159708 |
| H30 | -0.9922086209 | 11.4678791045 | 11.4310879100 |
| C31 | 2.4017413647  | 8.8601818858  | 10.9115440864 |
| H32 | 2.4217624906  | 7.8552793985  | 10.4421195210 |
| H33 | 1.5735555521  | 8.8745269016  | 11.6388476240 |
| C34 | 3.7261154734  | 9.1680069015  | 11.6111070330 |
| H35 | 4.5708512789  | 9.0293346236  | 10.9117447326 |
| H36 | 3.8922264828  | 8.4940528670  | 12.4691979911 |
| C37 | 3.1066387437  | 11.0179819193 | 13.8875513420 |
| H38 | 3.9308425378  | 10.6105579210 | 14.5022327075 |
| C39 | 1.8569507938  | 10.1566446844 | 14.1160424207 |
| H40 | 1.0442140761  | 10.4814209935 | 13.4428001054 |
| H41 | 1.5073338935  | 10.2671658847 | 15.1581487438 |
| H42 | 2.0479117863  | 9.0838749872  | 13.9454775156 |
| H43 | 2.7876430739  | 9.8053996886  | 9.1201832020  |
| C44 | 2.8397644110  | 12.4757576837 | 14.2944631758 |
| H45 | 3.7268427682  | 13.1197927574 | 14.1717290159 |
| H46 | 2.5311545219  | 12.5278494991 | 15.3538632411 |
| H47 | 2.0307797432  | 12.8910789960 | 13.6698966241 |
| C48 | 5.5153933111  | 11.4419847578 | 12.2927588161 |
| H49 | 5.4735310673  | 12.4171260884 | 12.8165537088 |
| C50 | 6.1865182967  | 11.6620673353 | 10.9296541740 |
| H51 | 5.5920745202  | 12.3394413368 | 10.2975711988 |
| H52 | 6.2941894492  | 10.7083050065 | 10.3817190093 |
| H53 | 7.2002709284  | 12.0793729833 | 11.0655338583 |
| C54 | 6.3228569050  | 10.4526765989 | 13.1520047312 |
| H55 | 6.3804970783  | 9.4606216774  | 12.6701073817 |
| H56 | 5.9019358649  | 10.3140399566 | 14.1612432237 |
| H57 | 7.3581253637  | 10.8180504571 | 13.2762223035 |
| H58 | 1.2678683653  | 11.6352904508 | 11.5828117177 |
| H59 | 3.5748967335  | 12.0317580304 | 9.5196259357  |
| C60 | 2.7601876769  | 13.4928503764 | 11.0136464315 |
| O61 | 3.7658796414  | 10.5498585202 | 7.5852036451  |
| C62 | 5.1550395346  | 10.2858709992 | 7.3914800063  |
| H63 | 3.6906387873  | 11.2405304432 | 8.3249913213  |
| H64 | 5.2548030267  | 9.5899903460  | 6.5411391020  |
| H65 | 5.6258161048  | 9.8124207445  | 8.2765962713  |



|     |              |               |               |
|-----|--------------|---------------|---------------|
| H66 | 5.7270178129 | 11.2035736411 | 7.1520982936  |
| O67 | 3.0371550192 | 14.6197190559 | 11.2831345236 |

**Name - Trans-DhC** \\G=-1721.204852 \\H=-1721.112034 \\SCF E(PBE-D3/BS1)=-1721.72192201301 \\ZeroPoint=360.530

| Atom | Angstroms     |               |               |
|------|---------------|---------------|---------------|
|      | x             | y             | z             |
| Fe1  | 2.4128822802  | 12.0762083706 | 10.5379867723 |
| P2   | 0.7471189514  | 12.5445206155 | 9.1661349062  |
| N3   | 2.2676608383  | 10.1626888525 | 9.7560463142  |
| C4   | 1.0436345313  | 9.8533833935  | 9.0094222924  |
| H5   | 0.2022318178  | 9.6110523277  | 9.6981670805  |
| H6   | 1.1997751493  | 8.9424988896  | 8.3879338169  |
| C7   | 0.6381291015  | 11.0202301640 | 8.1106828393  |
| H8   | -0.3559059259 | 10.8818390526 | 7.6521463381  |
| H9   | 1.3785814574  | 11.1486105266 | 7.3005508734  |
| P10  | 3.6728215289  | 11.1070668063 | 12.0879099561 |
| C11  | 0.8687567412  | 13.9762927002 | 7.9409719467  |
| H12  | 0.5765126998  | 14.8665144997 | 8.5300543519  |
| C13  | 2.3115059665  | 14.1761768229 | 7.4515152510  |
| H14  | 2.6940740033  | 13.2742673851 | 6.9390902875  |
| H15  | 2.9927663351  | 14.4102893439 | 8.2844903907  |
| H16  | 2.3561098016  | 15.0106579849 | 6.7285443613  |
| C17  | -0.1038964164 | 13.8231632855 | 6.7580597823  |
| H18  | -0.0744654433 | 14.7302798007 | 6.1304148909  |
| H19  | -1.1483405470 | 13.6759976717 | 7.0779937668  |
| H20  | 0.1768567680  | 12.9696541651 | 6.1182592353  |
| C21  | -0.9544871312 | 12.8330388653 | 9.9214224857  |
| H22  | -1.6033257035 | 13.1591790236 | 9.0863676825  |
| C23  | -0.8752955240 | 13.9572651188 | 10.9671489286 |
| H24  | -0.4476085466 | 14.8899393183 | 10.5628919473 |
| H25  | -0.2496119875 | 13.6390573938 | 11.8170033960 |
| H26  | -1.8851808312 | 14.1895380216 | 11.3474748388 |
| C27  | -1.5520357229 | 11.5600477900 | 10.5384675613 |
| H28  | -1.7502420987 | 10.7799786906 | 9.7855088270  |
| H29  | -2.5116139294 | 11.7988784257 | 11.0319820050 |
| H30  | -0.8717178297 | 11.1420133702 | 11.3013189605 |
| C31  | 2.4746922696  | 9.0864771370  | 10.7294931758 |
| H32  | 2.5565486505  | 8.1093731053  | 10.2015274246 |
| H33  | 1.6073353910  | 8.9914030451  | 11.4228345453 |
| C34  | 3.7526451714  | 9.3388399574  | 11.5255151855 |
| H35  | 4.6231893571  | 9.2665616187  | 10.8509113220 |
| H36  | 3.8939520077  | 8.6310099450  | 12.3591433052 |
| C37  | 3.0277655823  | 11.0744044103 | 13.8571754292 |
| H38  | 3.8318824191  | 10.6091908010 | 14.4585601708 |
| C39  | 1.7587448138  | 10.2210313012 | 13.9962732445 |
| H40  | 0.9630154545  | 10.6014708466 | 13.3328268573 |
| H41  | 1.3884880902  | 10.2674773516 | 15.0358027367 |

|     |              |               |               |
|-----|--------------|---------------|---------------|
| H42 | 1.9344521081 | 9.1608528275  | 13.7525650530 |
| H43 | 3.5753979197 | 10.1513020821 | 8.7953922066  |
| C44 | 2.7823615393 | 12.5036084264 | 14.3665035878 |
| H45 | 3.6692878184 | 13.1515535819 | 14.2675129964 |
| H46 | 2.5028694354 | 12.4800299730 | 15.4344700094 |
| H47 | 1.9572874103 | 12.9726568712 | 13.8067628040 |
| C48 | 5.4817098933 | 11.5970204444 | 12.3278390395 |
| H49 | 5.4476974405 | 12.4946764043 | 12.9744623343 |
| C50 | 6.1249078107 | 11.9840735929 | 10.9859697040 |
| H51 | 5.6871844421 | 12.9130123423 | 10.5867481904 |
| H52 | 5.9908138987 | 11.1963133937 | 10.2219774529 |
| H53 | 7.2084528707 | 12.1501614211 | 11.1187105113 |
| C54 | 6.2985950384 | 10.5040342787 | 13.0424564441 |
| H55 | 6.4152378636 | 9.6113969993  | 12.4046510926 |
| H56 | 5.8459594340 | 10.1825683118 | 13.9948338054 |
| H57 | 7.3113647415 | 10.8817738881 | 13.2692761803 |
| H58 | 3.2965944016 | 12.4062017742 | 9.1754499127  |
| C59 | 2.5243949737 | 13.6705579703 | 11.1902086716 |
| O60 | 4.4417910375 | 10.0876081189 | 8.2137869384  |
| C61 | 4.5673123593 | 8.7254098739  | 7.8533799712  |
| H62 | 3.8625595359 | 12.1288818061 | 9.7347730372  |
| H63 | 3.6873484248 | 8.3355277833  | 7.2930223241  |
| H64 | 4.7149463208 | 8.0518539351  | 8.7285103473  |
| H65 | 5.4490594998 | 8.5972259578  | 7.1996017753  |
| O66 | 2.5732566832 | 14.7646922921 | 11.6429789051 |
| H67 | 1.3125542979 | 11.7135227093 | 11.4778915414 |

**Name - Trans-DhD** \\G=-1720.054941 \\H=-1719.959409 \\SCF E (PBE-D3/BS1)=-  
1720.55253110456 \\ZeroPoint=349.878

| Angstroms |               |               |               |
|-----------|---------------|---------------|---------------|
| Atom      | x             | y             | z             |
| Fe1       | 2.3274378880  | 11.8826892168 | 10.6015223010 |
| O2        | 3.3160893248  | 14.5911839987 | 10.9986739067 |
| P3        | 0.7904297250  | 12.4508334311 | 9.1388175200  |
| N4        | 2.1134835176  | 10.1340854315 | 9.9397500004  |
| C5        | 1.0127997538  | 9.7331200907  | 9.0372506423  |
| H6        | 0.1518356092  | 9.3734845180  | 9.6404024108  |
| H7        | 1.3309987781  | 8.8688407156  | 8.4145534568  |
| C8        | 0.5847768575  | 10.8938506343 | 8.1365770613  |
| H9        | -0.4381617267 | 10.7691856978 | 7.7429842585  |
| H10       | 1.2778569755  | 10.9683449724 | 7.2812535452  |
| P11       | 3.6758013857  | 10.9936082080 | 12.0794332936 |
| C12       | 1.1729810278  | 13.7960374782 | 7.8799276035  |
| H13       | 1.1398535834  | 14.7339308828 | 8.4667550926  |
| C14       | 2.6081861010  | 13.6174776328 | 7.3560845568  |
| H15       | 2.7346533810  | 12.6672816651 | 6.8109583930  |
| H16       | 3.3345039179  | 13.6141124061 | 8.1839721586  |
| H17       | 2.8643185637  | 14.4418706969 | 6.6674081502  |
| C18       | 0.1510121906  | 13.8822797853 | 6.7353188451  |

|     |               |               |               |
|-----|---------------|---------------|---------------|
| H19 | 0.4227416187  | 14.7019235971 | 6.0464178485  |
| H20 | -0.8717097815 | 14.0796252155 | 7.0960257617  |
| H21 | 0.1316053797  | 12.9494981057 | 6.1451221973  |
| C22 | -0.9240011920 | 12.8744380945 | 9.7822673605  |
| H23 | -1.5713192123 | 13.0296595457 | 8.8978598481  |
| C24 | -0.8706109449 | 14.1670421240 | 10.6122087313 |
| H25 | -0.5402254010 | 15.0351306619 | 10.0174744153 |
| H26 | -0.1724011522 | 14.0482681987 | 11.4592264636 |
| H27 | -1.8707694891 | 14.4012591502 | 11.0183293501 |
| C28 | -1.4812555149 | 11.7033709634 | 10.6083261731 |
| H29 | -1.6429450864 | 10.8009121622 | 9.9959524484  |
| H30 | -2.4522231562 | 11.9817630284 | 11.0558470176 |
| H31 | -0.7844540601 | 11.4442286977 | 11.4246240510 |
| C32 | 2.5704564909  | 8.9323913268  | 10.6707634848 |
| H33 | 2.7814588553  | 8.1103956351  | 9.9535034668  |
| H34 | 1.7477078807  | 8.5633774424  | 11.3208565557 |
| C35 | 3.8141534109  | 9.2229278702  | 11.5146204148 |
| H36 | 4.7248167990  | 9.1476913329  | 10.8957322908 |
| H37 | 3.9237734457  | 8.5175342697  | 12.3560078253 |
| C38 | 3.1168673564  | 10.9049960982 | 13.8699202917 |
| H39 | 3.8809941996  | 10.3196913202 | 14.4167313892 |
| C40 | 1.7674876095  | 10.1738042612 | 13.9640424895 |
| H41 | 1.0137768243  | 10.6773487940 | 13.3338058034 |
| H42 | 1.4059283406  | 10.1765610512 | 15.0079260472 |
| H43 | 1.8386274580  | 9.1226585345  | 13.6385405469 |
| H44 | 3.4113907468  | 10.4856375340 | 8.4957429865  |
| C45 | 3.0295573206  | 12.3199706965 | 14.4633883802 |
| H46 | 4.0056375722  | 12.8337411443 | 14.4693810635 |
| H47 | 2.6684857604  | 12.2748446795 | 15.5060770877 |
| H48 | 2.3235202944  | 12.9362971187 | 13.8796927291 |
| C49 | 5.4456061983  | 11.6300290064 | 12.1507739212 |
| H50 | 5.3389556996  | 12.6618885867 | 12.5377315692 |
| C51 | 6.0106219735  | 11.7221736572 | 10.7213433614 |
| H52 | 5.3224281104  | 12.2687176839 | 10.0537455590 |
| H53 | 6.1767778920  | 10.7212310209 | 10.2819648783 |
| H54 | 6.9843362030  | 12.2431426841 | 10.7309197211 |
| C55 | 6.3684673400  | 10.8312442008 | 13.0846970769 |
| H56 | 6.4454345218  | 9.7757185506  | 12.7666659213 |
| H57 | 6.0237846072  | 10.8480333616 | 14.1321294479 |
| H58 | 7.3878443508  | 11.2564542959 | 13.0648250289 |
| C59 | 2.9110121773  | 13.4829833279 | 10.8335858610 |
| H60 | 1.3748308486  | 12.1882496995 | 11.6842789664 |
| O61 | 3.9520602565  | 10.4373040213 | 7.6609156476  |
| C62 | 4.5267476383  | 9.1353997759  | 7.6141175698  |
| H63 | 3.7660580818  | 8.3281603293  | 7.5568983332  |
| H64 | 5.1814744312  | 8.9171441763  | 8.4833763709  |
| H65 | 5.1517765121  | 9.0649140016  | 6.7080640464  |

Name - Trans-TS-Dh1\\G=-1721.199986\\H=-1721.112972\\SCF E(PBE-D3/BS1)=-1721.70658041943\\ZeroPoint=360.552

| Atom | Angstroms     |               |               |
|------|---------------|---------------|---------------|
|      | x             | y             | z             |
| Fe1  | 2.5098545229  | 11.9440940804 | 10.5199716516 |
| P2   | 0.8199998834  | 12.4608270884 | 9.1803837005  |
| N3   | 2.1953751386  | 10.0092465396 | 9.8383281305  |
| C4   | 0.8248905277  | 9.7519507186  | 9.3745619240  |
| H5   | 0.1136603713  | 9.7011571376  | 10.2292501370 |
| H6   | 0.7806322487  | 8.7605928213  | 8.8697630925  |
| C7   | 0.3879891954  | 10.8377715411 | 8.3907256964  |
| H8   | -0.6786349926 | 10.7705483883 | 8.1196295339  |
| H9   | 0.9895009722  | 10.7633790491 | 7.4693498633  |
| P10  | 3.7351046211  | 10.9801475933 | 12.0815586647 |
| C11  | 1.0714934990  | 13.6437939826 | 7.7292593028  |
| H12  | 1.0023639190  | 14.6539071405 | 8.1744809524  |
| C13  | 2.4750030626  | 13.4690745307 | 7.1254010182  |
| H14  | 2.6777184949  | 12.4136107305 | 6.8656587971  |
| H15  | 3.2561159885  | 13.7984118480 | 7.8284251967  |
| H16  | 2.5703187109  | 14.0723471009 | 6.2047610824  |
| C17  | -0.0195251094 | 13.5036749765 | 6.6521965209  |
| H18  | 0.1021072282  | 14.2929474292 | 5.8899204412  |
| H19  | -1.0383414373 | 13.5945065758 | 7.0584182358  |
| H20  | 0.0539738587  | 12.5332270453 | 6.1363029413  |
| C21  | -0.7676595500 | 13.0994649993 | 9.9643160640  |
| H22  | -1.4382264268 | 13.3438578567 | 9.1181375169  |
| C23  | -0.4994350054 | 14.3759562311 | 10.7772289504 |
| H24  | 0.0015456281  | 15.1615591187 | 10.1866692705 |
| H25  | 0.1368333947  | 14.1499784371 | 11.6486593923 |
| H26  | -1.4523877664 | 14.7925280495 | 11.1486194611 |
| C27  | -1.4482804497 | 12.0324740692 | 10.8344628020 |
| H28  | -1.7580187426 | 11.1485748504 | 10.2536717785 |
| H29  | -2.3528878938 | 12.4552815363 | 11.3067723790 |
| H30  | -0.7678925485 | 11.6972032522 | 11.6368341976 |
| C31  | 2.5627584774  | 8.9215360825  | 10.7542510972 |
| H32  | 2.6677883810  | 7.9713207747  | 10.1845541579 |
| H33  | 1.7588320779  | 8.7431103545  | 11.5018826831 |
| C34  | 3.8676443358  | 9.2243527708  | 11.4906351882 |
| H35  | 4.7228038634  | 9.1931677842  | 10.7918193295 |
| H36  | 4.0700637647  | 8.5099208870  | 12.3067431204 |
| C37  | 3.0321768826  | 10.9301108042 | 13.8284815529 |
| H38  | 3.8401000714  | 10.5246608626 | 14.4665612548 |
| C39  | 1.8071342042  | 10.0130706403 | 13.9473279804 |
| H40  | 1.0182879216  | 10.3270641836 | 13.2423075807 |
| H41  | 1.3929943167  | 10.0728924404 | 14.9695705220 |
| H42  | 2.0505110434  | 8.9573141091  | 13.7486356344 |
| H43  | 2.9625374236  | 9.9535976491  | 8.4685716286  |
| C44  | 2.6912323513  | 12.3542489196 | 14.2943168941 |
| H45  | 3.5461032231  | 13.0465726598 | 14.2191569920 |
| H46  | 2.3655503867  | 12.3370895340 | 15.3492048570 |
| H47  | 1.8702989559  | 12.7649571322 | 13.6840675638 |
| C48  | 5.5101991802  | 11.5340335377 | 12.4161979116 |

|     |              |               |               |
|-----|--------------|---------------|---------------|
| H49 | 5.3965626550 | 12.3954650285 | 13.1013696149 |
| C50 | 6.2019724496 | 12.0276978307 | 11.1376748071 |
| H51 | 5.6672795445 | 12.8810742245 | 10.6917938007 |
| H52 | 6.2654807690 | 11.2293106274 | 10.3772099617 |
| H53 | 7.2334898056 | 12.3510797179 | 11.3641267283 |
| C54 | 6.3469852837 | 10.4501595309 | 13.1203137579 |
| H55 | 6.5291753867 | 9.5921608486  | 12.4523507198 |
| H56 | 5.8689480737 | 10.0687100939 | 14.0366671580 |
| H57 | 7.3304642947 | 10.8607809774 | 13.4074793739 |
| H58 | 1.4080177160 | 11.7190882697 | 11.4989695489 |
| H59 | 3.9463847083 | 11.9551972267 | 9.6930646659  |
| C60 | 2.7585091682 | 13.5509353864 | 11.0984048115 |
| O61 | 3.3547199147 | 9.9058528192  | 7.4901861290  |
| C62 | 4.7526069018 | 10.0882214098 | 7.5746447585  |
| H63 | 3.3558090982 | 12.0400881215 | 9.1004074070  |
| H64 | 5.2665327870 | 9.5357245276  | 6.7616840405  |
| H65 | 5.1804124969 | 9.7159500306  | 8.5320239227  |
| H66 | 5.0571832839 | 11.1575381087 | 7.4884932820  |
| O67 | 2.9239678437 | 14.6440520131 | 11.5246987954 |

**Name - Trans-TS-Dh2** \\G=-1721.203288 \\H=-1721.108649 \\SCF E(PBE-D3/BS1)=-1721.71583205730 \\ZeroPoint=358.655

Angstroms

| Atom | x             | y             | z             |
|------|---------------|---------------|---------------|
| Fe1  | 2.4111725764  | 12.0807929203 | 10.5426172701 |
| P2   | 0.7504469071  | 12.5567641821 | 9.1607941238  |
| N3   | 2.2509393018  | 10.1746048414 | 9.7707593291  |
| C4   | 1.0467828277  | 9.8537382309  | 8.9918936637  |
| H5   | 0.1978370934  | 9.5805056580  | 9.6586092801  |
| H6   | 1.2338588462  | 8.9579207360  | 8.3572915912  |
| C7   | 0.6354186500  | 11.0295424353 | 8.1041191729  |
| H8   | -0.3608383578 | 10.8916282607 | 7.6500782016  |
| H9   | 1.3696061459  | 11.1627580292 | 7.2889276343  |
| P10  | 3.6801862927  | 11.1054688529 | 12.0859403088 |
| C11  | 0.8334757140  | 13.9940418207 | 7.9337171384  |
| H12  | 0.5305447376  | 14.8745918194 | 8.5318897309  |
| C13  | 2.2660720335  | 14.2295781819 | 7.4322196678  |
| H14  | 2.6583305833  | 13.3477195304 | 6.8936491638  |
| H15  | 2.9523725606  | 14.4576380077 | 8.2631951253  |
| H16  | 2.2876450019  | 15.0805202602 | 6.7286429014  |
| C17  | -0.1476165945 | 13.8315576938 | 6.7587071012  |
| H18  | -0.1439431730 | 14.7445762625 | 6.1372777018  |
| H19  | -1.1856848884 | 13.6605469379 | 7.0882580096  |
| H20  | 0.1447225784  | 12.9888283442 | 6.1088720615  |
| C21  | -0.9456723601 | 12.8352138013 | 9.9348206943  |
| H22  | -1.6095647421 | 13.1533989137 | 9.1084359818  |
| C23  | -0.8607694030 | 13.9645125652 | 10.9753385637 |
| H24  | -0.4529321565 | 14.9007292674 | 10.5584946722 |
| H25  | -0.2123191935 | 13.6587590521 | 11.8133936437 |
| H26  | -1.8659973689 | 14.1864310795 | 11.3753614986 |

|     |               |               |               |
|-----|---------------|---------------|---------------|
| C27 | -1.5237074088 | 11.5586499230 | 10.5631204327 |
| H28 | -1.7275322864 | 10.7770210618 | 9.8134078466  |
| H29 | -2.4769687378 | 11.7897184599 | 11.0717857178 |
| H30 | -0.8285946614 | 11.1457353203 | 11.3149952431 |
| C31 | 2.4795621120  | 9.0783120598  | 10.7214895337 |
| H32 | 2.5755314969  | 8.1139280980  | 10.1733939716 |
| H33 | 1.6158534687  | 8.9532087394  | 11.4133292858 |
| C34 | 3.7576326546  | 9.3351977439  | 11.5198519626 |
| H35 | 4.6286452623  | 9.2667332055  | 10.8447276049 |
| H36 | 3.9007465810  | 8.6241565698  | 12.3507885458 |
| C37 | 3.0189424284  | 11.0717130153 | 13.8504580376 |
| H38 | 3.8218357816  | 10.6188463754 | 14.4629469401 |
| C39 | 1.7568899088  | 10.2070050257 | 13.9839077330 |
| H40 | 0.9611988513  | 10.5762777482 | 13.3137093222 |
| H41 | 1.3776875784  | 10.2542837042 | 15.0205945995 |
| H42 | 1.9451776050  | 9.1477226378  | 13.7457718413 |
| H43 | 3.5930191430  | 10.1282669730 | 8.7869413951  |
| C44 | 2.7553718611  | 12.5019080912 | 14.3480543628 |
| H45 | 3.6388053712  | 13.1557074888 | 14.2567711902 |
| H46 | 2.4610493881  | 12.4839917902 | 15.4124509668 |
| H47 | 1.9357397522  | 12.9612133602 | 13.7715421871 |
| C48 | 5.4894394643  | 11.5850683712 | 12.3641662505 |
| H49 | 5.4415242047  | 12.4659380585 | 13.0326534890 |
| C50 | 6.1549791453  | 12.0122758338 | 11.0459857699 |
| H51 | 5.6993421836  | 12.9344175602 | 10.6510301945 |
| H52 | 6.0641202578  | 11.2304066386 | 10.2693302275 |
| H53 | 7.2306350791  | 12.2067644124 | 11.2061103552 |
| C54 | 6.2982675126  | 10.4776546475 | 13.0641319933 |
| H55 | 6.4232964334  | 9.5992531660  | 12.4080434603 |
| H56 | 5.8333932631  | 10.1351152646 | 14.0034550023 |
| H57 | 7.3080424156  | 10.8506069136 | 13.3118930652 |
| H58 | 3.5352139263  | 12.4656025764 | 8.9702169735  |
| C59 | 2.5752870008  | 13.6842873514 | 11.1578992253 |
| O60 | 4.4486818800  | 10.0177193371 | 8.2120939347  |
| C61 | 4.5465521853  | 8.6397254494  | 7.9020159643  |
| H62 | 4.0695401247  | 12.1585499462 | 9.4631128604  |
| H63 | 3.6544545234  | 8.2453805660  | 7.3672298376  |
| H64 | 4.6953866294  | 7.9970743862  | 8.7994054009  |
| H65 | 5.4182108657  | 8.4771082784  | 7.2415165019  |
| O66 | 2.6508636452  | 14.7854719114 | 11.5964767613 |
| H67 | 1.3260340837  | 11.7932061403 | 11.5075378177 |

**Name - Cis-DhB** \\G=-1721.219159 \\H=-1721.124427 \\SCF E(PBE-D3/BS1)=-1721.73852521013 \\ZeroPoint=363.839

| Angstroms |              |               |               |
|-----------|--------------|---------------|---------------|
| Atom      | x            | y             | z             |
| Fe1       | 2.1289385357 | 11.8321043017 | 10.8222141256 |
| O2        | 0.0919435128 | 12.0448461981 | 12.8957553793 |
| P3        | 0.8274687264 | 12.4465460400 | 9.1607872716  |
| N4        | 1.9593047685 | 9.8851884164  | 10.0441489607 |

|     |               |               |               |
|-----|---------------|---------------|---------------|
| C5  | 0.6622509427  | 9.6936654957  | 9.3494832905  |
| H6  | -0.1355363583 | 9.7524196796  | 10.1090536238 |
| H7  | 0.6150235946  | 8.6928697196  | 8.8717622145  |
| C8  | 0.5162009645  | 10.8037003728 | 8.2984572785  |
| H9  | -0.4576594082 | 10.7566506568 | 7.7835328103  |
| H10 | 1.3105192452  | 10.6864093980 | 7.5402527897  |
| P11 | 3.6951676772  | 10.9997248524 | 12.1159178577 |
| C12 | 1.3478137761  | 13.6490479312 | 7.7834425792  |
| H13 | 1.0005840801  | 14.6244602586 | 8.1755308034  |
| C14 | 2.8635280391  | 13.7420520275 | 7.5755533812  |
| H15 | 3.2589134675  | 12.8020879669 | 7.1558865482  |
| H16 | 3.3853180122  | 13.9343078669 | 8.5254195240  |
| H17 | 3.0976650978  | 14.5559008132 | 6.8657259612  |
| C18 | 0.6285405191  | 13.3787527744 | 6.4488784146  |
| H19 | 0.8371800567  | 14.1961364191 | 5.7356151775  |
| H20 | -0.4667374265 | 13.3054383597 | 6.5550172974  |
| H21 | 0.9867415499  | 12.4418343651 | 5.9883412399  |
| C22 | -0.9041983156 | 13.1468311552 | 9.4760579641  |
| H23 | -1.2773869311 | 13.4629040014 | 8.4827222532  |
| C24 | -0.8141960605 | 14.3894057280 | 10.3795656879 |
| H25 | -0.1228252709 | 15.1507029118 | 9.9802735768  |
| H26 | -0.4647690486 | 14.1147801074 | 11.3870334642 |
| H27 | -1.8087801119 | 14.8608933366 | 10.4758950362 |
| C28 | -1.8894309083 | 12.1144585755 | 10.0450586408 |
| H29 | -2.0380212050 | 11.2578009363 | 9.3671900034  |
| H30 | -2.8766373322 | 12.5873593662 | 10.1960766742 |
| H31 | -1.5529298043 | 11.7325469654 | 11.0211522848 |
| C32 | 2.2871133417  | 8.8637689127  | 11.0674225601 |
| H33 | 2.2590199881  | 7.8433590729  | 10.6316421264 |
| H34 | 1.5213692876  | 8.9226394412  | 11.8591993331 |
| C35 | 3.6829716660  | 9.1821791086  | 11.6210728893 |
| H36 | 4.4320530348  | 9.0512743543  | 10.8181559976 |
| H37 | 3.9639098423  | 8.5042271768  | 12.4441028792 |
| C38 | 3.5011552323  | 10.9792563897 | 13.9990290636 |
| H39 | 4.4694330897  | 10.6179260670 | 14.3947284773 |
| C40 | 2.4038457728  | 10.0226067950 | 14.4906388354 |
| H41 | 1.4142752034  | 10.3127562838 | 14.1062086891 |
| H42 | 2.3536722850  | 10.0529901126 | 15.5939769437 |
| H43 | 2.5973594173  | 8.9763376198  | 14.2018161518 |
| H44 | 2.6897520439  | 9.8118671627  | 9.3153817288  |
| C45 | 3.2685420392  | 12.4102247160 | 14.5148365085 |
| H46 | 4.0617745532  | 13.1061460950 | 14.1934215820 |
| H47 | 3.2470118411  | 12.4157637077 | 15.6195000585 |
| H48 | 2.3077127392  | 12.8053655522 | 14.1499277911 |
| C49 | 5.5215545581  | 11.5104200822 | 12.0258305803 |
| H50 | 5.5715267143  | 12.3704129555 | 12.7212679383 |
| C51 | 5.9375585174  | 12.0028868629 | 10.6364025747 |
| H52 | 5.2780632880  | 12.8085577729 | 10.2810765103 |
| H53 | 5.8909063237  | 11.1826737661 | 9.8996040713  |
| H54 | 6.9797853026  | 12.3691754108 | 10.6565816685 |
| C55 | 6.4858804936  | 10.4185057593 | 12.5259172613 |
| H56 | 6.5189510031  | 9.5659128406  | 11.8248821015 |

|     |              |               |               |
|-----|--------------|---------------|---------------|
| H57 | 6.2194539428 | 10.0260294730 | 13.5213577735 |
| H58 | 7.5108014022 | 10.8252778549 | 12.5959196515 |
| C59 | 0.9057438198 | 11.8876331058 | 12.0346475152 |
| H60 | 3.2879553038 | 12.1307190008 | 9.8298550865  |
| H61 | 2.4763328466 | 13.2553929926 | 11.1804499965 |
| O62 | 3.8266943111 | 10.5205972245 | 7.8970202678  |
| C63 | 5.1123481804 | 10.5190814946 | 7.2742815162  |
| H64 | 3.7836572290 | 11.2326221265 | 8.5949216862  |
| H65 | 5.0855599484 | 9.7747333395  | 6.4614341341  |
| H66 | 5.9275622681 | 10.2375211244 | 7.9689457420  |
| H67 | 5.3586685540 | 11.5035946316 | 6.8308767365  |

**Name - Cis-DhC** \\G=-1721.197081 \\H=-1721.099372 \\SCF E(PBE-D3/BS1)=-  
1721.70900107176 \\ZeroPoint=360.358

| Atom | Angstroms     |               |               |
|------|---------------|---------------|---------------|
|      | x             | y             | z             |
| Fe1  | 2.1321847882  | 11.9294653346 | 10.8339286979 |
| O2   | 0.0045902547  | 11.6165797723 | 12.7744792341 |
| P3   | 0.7837044820  | 12.5059879480 | 9.1362070279  |
| N4   | 2.1828125282  | 10.0879410517 | 9.9082064608  |
| C5   | 0.9305197143  | 9.7860948069  | 9.2149787734  |
| H6   | 0.0746819015  | 9.6866558535  | 9.9240758695  |
| H7   | 1.0128700101  | 8.8131167044  | 8.6801443269  |
| C8   | 0.6450115109  | 10.8987973074 | 8.2029447342  |
| H9   | -0.3193637813 | 10.7820409315 | 7.6816489658  |
| H10  | 1.4513965717  | 10.9077241204 | 7.4487438187  |
| P11  | 3.7358803919  | 11.0749759306 | 12.1501714001 |
| C12  | 1.3601905495  | 13.7570183876 | 7.8341361638  |
| H13  | 1.0794587930  | 14.7388545502 | 8.2602179065  |
| C14  | 2.8830030910  | 13.7325814652 | 7.6136778262  |
| H15  | 3.2668826105  | 12.7074030789 | 7.4599513821  |
| H16  | 3.4241601657  | 14.1692682000 | 8.4674536549  |
| H17  | 3.1386088772  | 14.3323965270 | 6.7223584453  |
| C18  | 0.6170026039  | 13.5726581015 | 6.4954997257  |
| H19  | 0.8568498190  | 14.4138720857 | 5.8216454016  |
| H20  | -0.4792866934 | 13.5413852756 | 6.6064091520  |
| H21  | 0.9321687695  | 12.6451880213 | 5.9884201510  |
| C22  | -0.9682001678 | 13.1192965421 | 9.4598767307  |
| H23  | -1.3288069122 | 13.4937961144 | 8.4831305367  |
| C24  | -0.9371663423 | 14.2978437965 | 10.4487671144 |
| H25  | -0.2617591759 | 15.1047631283 | 10.1177497833 |
| H26  | -0.6016718552 | 13.9671784683 | 11.4444117599 |
| H27  | -1.9486121673 | 14.7293900130 | 10.5519906528 |
| C28  | -1.9273528460 | 12.0113673819 | 9.9236072840  |
| H29  | -2.0092782044 | 11.1941360957 | 9.1889422009  |
| H30  | -2.9383992169 | 12.4351403464 | 10.0599731778 |
| H31  | -1.6164137260 | 11.5795127343 | 10.8867016366 |
| C32  | 2.5278206797  | 9.0137524350  | 10.8394930224 |
| H33  | 2.6039377206  | 8.0447580625  | 10.2965403602 |
| H34  | 1.7472727307  | 8.8764135320  | 11.6249268754 |



|     |              |               |               |
|-----|--------------|---------------|---------------|
| C35 | 3.8749836316 | 9.3373394691  | 11.4915606433 |
| H36 | 4.6500703897 | 9.3660683526  | 10.7057133555 |
| H37 | 4.1798679476 | 8.6060741804  | 12.2582206098 |
| C38 | 3.4943839702 | 10.9493821725 | 14.0145153059 |
| H39 | 4.4870590903 | 10.6701418931 | 14.4158865571 |
| C40 | 2.4938116722 | 9.8585774686  | 14.4291223982 |
| H41 | 1.4846912933 | 10.0615111773 | 14.0399229697 |
| H42 | 2.4241681360 | 9.8242482426  | 15.5311182556 |
| H43 | 2.8013810458 | 8.8571295346  | 14.0869854205 |
| H44 | 3.3464080058 | 10.3231427833 | 8.8807052424  |
| C45 | 3.1102492099 | 12.3247120222 | 14.5881358104 |
| H46 | 3.8295820294 | 13.1119960056 | 14.3059438238 |
| H47 | 3.0813022817 | 12.2778960341 | 15.6912612233 |
| H48 | 2.1156603898 | 12.6359739971 | 14.2315544210 |
| C49 | 5.5049249083 | 11.7516556937 | 12.0720556985 |
| H50 | 5.5056081677 | 12.5892989022 | 12.7949852677 |
| C51 | 5.8768331779 | 12.2988706429 | 10.6829478188 |
| H52 | 5.3588414308 | 13.2464904425 | 10.4675866403 |
| H53 | 5.6301878980 | 11.5866575939 | 9.8740005326  |
| H54 | 6.9616496644 | 12.5016267171 | 10.6433540328 |
| C55 | 6.5374866112 | 10.7038763130 | 12.5344921284 |
| H56 | 6.6353903477 | 9.8885950533  | 11.7981833200 |
| H57 | 6.2921961374 | 10.2513242610 | 13.5092098787 |
| H58 | 7.5286858556 | 11.1806738705 | 12.6313061556 |
| C59 | 0.8638566875 | 11.6837252648 | 11.9611102251 |
| H60 | 3.1961886089 | 12.9408903493 | 10.2689241760 |
| H61 | 2.1502525946 | 13.3188065542 | 11.4778078056 |
| O62 | 4.1392502115 | 10.4974084797 | 8.2034768004  |
| C63 | 4.3136506213 | 9.2917478511  | 7.4861213923  |
| H64 | 3.3502930436 | 12.2286457216 | 9.7909484585  |
| H65 | 3.4088877652 | 8.9916682472  | 6.9110384732  |
| H66 | 4.5795163298 | 8.4299697116  | 8.1389675071  |
| H67 | 5.1369738305 | 9.4102559224  | 6.7569924642  |

Name - Cis-TS-Dh1\\G=-1721.194248\\H=-1721.098994\\SCF E(PBE-D3/BS1)=-  
1721.70508684991\\ZeroPoint=358.608

| Angstroms |               |               |               |
|-----------|---------------|---------------|---------------|
| Atom      | x             | y             | z             |
| Fe1       | 2.1721068579  | 11.8949289798 | 10.7857260419 |
| O2        | 0.1087095114  | 11.8409242877 | 12.8136618673 |
| P3        | 0.7737404237  | 12.4866473733 | 9.1305438509  |
| N4        | 2.0680257806  | 10.0063146111 | 9.9458413270  |
| C5        | 0.7735093967  | 9.7504196183  | 9.2938897821  |
| H6        | -0.0423119364 | 9.7194513686  | 10.0452400708 |
| H7        | 0.7906718554  | 8.7622759795  | 8.7847390590  |
| C8        | 0.5290827568  | 10.8551925182 | 8.2591747771  |
| H9        | -0.4501455934 | 10.7709472345 | 7.7603295816  |
| H10       | 1.3297073823  | 10.7931492254 | 7.5011138337  |
| P11       | 3.7442825471  | 11.0174100879 | 12.1159676195 |

|     |               |               |               |
|-----|---------------|---------------|---------------|
| C12 | 1.3168845682  | 13.7006739747 | 7.7802470687  |
| H13 | 0.9892504763  | 14.6834765553 | 8.1701767515  |
| C14 | 2.8386345012  | 13.7370639564 | 7.5699933032  |
| H15 | 3.2485933605  | 12.7246667095 | 7.3992617953  |
| H16 | 3.3523563760  | 14.1685628068 | 8.4443620004  |
| H17 | 3.0769630141  | 14.3709842904 | 6.6971046887  |
| C18 | 0.5851309072  | 13.4340822530 | 6.4499445500  |
| H19 | 0.7815970527  | 14.2631499176 | 5.7471809335  |
| H20 | -0.5087176084 | 13.3511946601 | 6.5648527935  |
| H21 | 0.9474777587  | 12.5062827863 | 5.9762101278  |
| C22 | -0.9474773055 | 13.1596704751 | 9.4984567047  |
| H23 | -1.3258818018 | 13.5088495276 | 8.5182760670  |
| C24 | -0.8568779814 | 14.3724599840 | 10.4413297162 |
| H25 | -0.1668343524 | 15.1461349549 | 10.0641898359 |
| H26 | -0.5076372825 | 14.0699844338 | 11.4412178934 |
| H27 | -1.8522198675 | 14.8380353016 | 10.5518875391 |
| C28 | -1.9218684873 | 12.0961974882 | 10.0295599035 |
| H29 | -2.0524986631 | 11.2595328799 | 9.3242615428  |
| H30 | -2.9152617463 | 12.5532988518 | 10.1861036143 |
| H31 | -1.5902457349 | 11.6856992436 | 10.9956031912 |
| C32 | 2.4366541235  | 8.9394602585  | 10.8863167466 |
| H33 | 2.4784367203  | 7.9604995105  | 10.3613992912 |
| H34 | 1.6721189151  | 8.8478255292  | 11.6855724276 |
| C35 | 3.8063225677  | 9.2571176643  | 11.4951036371 |
| H36 | 4.5711046027  | 9.2315562046  | 10.6992332859 |
| H37 | 4.1054702833  | 8.5348395853  | 12.2726036433 |
| C38 | 3.5159773261  | 10.9095704749 | 13.9830644811 |
| H39 | 4.4992298863  | 10.5764235680 | 14.3675972841 |
| C40 | 2.4645276095  | 9.8735872974  | 14.4120522675 |
| H41 | 1.4625822522  | 10.1290746227 | 14.0345773564 |
| H42 | 2.4067553612  | 9.8447552337  | 15.5147645891 |
| H43 | 2.7146547794  | 8.8561823733  | 14.0700742366 |
| H44 | 2.9221748984  | 10.1487264464 | 9.0250794087  |
| C45 | 3.2146412486  | 12.3023531011 | 14.5642653778 |
| H46 | 3.9691822478  | 13.0519615287 | 14.2715618611 |
| H47 | 3.2030329743  | 12.2538018343 | 15.6675285140 |
| H48 | 2.2311283787  | 12.6665384728 | 14.2277994867 |
| C49 | 5.5386503907  | 11.6256747805 | 12.0381347130 |
| H50 | 5.5758382868  | 12.4222334974 | 12.8051553659 |
| C51 | 5.9096670145  | 12.2456935101 | 10.6825622037 |
| H52 | 5.3622398385  | 13.1842357293 | 10.5036794406 |
| H53 | 5.6918096604  | 11.5640540919 | 9.8426488038  |
| H54 | 6.9890971541  | 12.4770070453 | 10.6612258217 |
| C55 | 6.5415683830  | 10.5223555544 | 12.4290460965 |
| H56 | 6.6151343464  | 9.7523914773  | 11.6422763593 |
| H57 | 6.2852060820  | 10.0168956340 | 13.3749178667 |
| H58 | 7.5465823810  | 10.9630893836 | 12.5523529265 |
| C59 | 0.9410977745  | 11.8123385658 | 11.9692709350 |
| H60 | 3.3358764386  | 12.6645366219 | 10.0030699368 |
| H61 | 2.3442136596  | 13.3144163295 | 11.3101515609 |
| O62 | 3.6639672243  | 10.5609699744 | 8.0978400912  |
| C63 | 4.7409543156  | 9.7200801495  | 7.8218997093  |

|     |              |               |              |
|-----|--------------|---------------|--------------|
| H64 | 3.3816286377 | 11.9256497753 | 9.5792483415 |
| H65 | 4.4721382113 | 8.8311840533  | 7.1943218346 |
| H66 | 5.2413398156 | 9.2993462066  | 8.7343717963 |
| H67 | 5.5479577332 | 10.2534309632 | 7.2659346743 |

**Name - Cis-TS-Dh2** \\G=-1721.185352 \\H=-1721.088197 \\SCF E(PBE-D3/BS1)=-1721.69542742992 \\ZeroPoint=359.008

| Atom | Angstroms     |               |               |
|------|---------------|---------------|---------------|
|      | x             | y             | z             |
| Fe1  | 2.2532216880  | 11.9382896113 | 10.7259054203 |
| O2   | 0.5529389495  | 12.8611977712 | 12.8416064189 |
| P3   | 0.7621106579  | 12.4847998151 | 9.1175803940  |
| N4   | 2.1978530236  | 10.1650268407 | 9.9332168348  |
| C5   | 1.0562205663  | 9.7662682276  | 9.0933353689  |
| H6   | 0.1837812211  | 9.4851560551  | 9.7228247025  |
| H7   | 1.3126507675  | 8.8571919290  | 8.5051172072  |
| C8   | 0.6872079319  | 10.9003965705 | 8.1373935158  |
| H9   | -0.2946318519 | 10.7532848467 | 7.6564484074  |
| H10  | 1.4565846677  | 10.9735748738 | 7.3486116572  |
| P11  | 3.7493057720  | 11.0391965851 | 12.1624175417 |
| C12  | 1.0646085246  | 13.8258970927 | 7.8108651030  |
| H13  | 0.8591184046  | 14.7732024983 | 8.3433030879  |
| C14  | 2.5247470994  | 13.8610003426 | 7.3365124685  |
| H15  | 2.8669460141  | 12.8784697721 | 6.9664022347  |
| H16  | 3.2042072831  | 14.1661431099 | 8.1446433142  |
| H17  | 2.6274811333  | 14.5869304635 | 6.5104239444  |
| C18  | 0.1063880205  | 13.7091038369 | 6.6099883840  |
| H19  | 0.2927965970  | 14.5434404256 | 5.9106020727  |
| H20  | -0.9564085601 | 13.7543500819 | 6.8955349299  |
| H21  | 0.2718284222  | 12.7705304739 | 6.0537053724  |
| C22  | -1.0407711766 | 12.8105078832 | 9.5737733628  |
| H23  | -1.5712799762 | 12.8216756685 | 8.6029486741  |
| C24  | -1.2305232341 | 14.1819645839 | 10.2449646071 |
| H25  | -0.8711431570 | 15.0123904904 | 9.6154870266  |
| H26  | -0.7063887731 | 14.2323649540 | 11.2115446356 |
| H27  | -2.3048970360 | 14.3549386260 | 10.4344685491 |
| C28  | -1.6408616544 | 11.6724346375 | 10.4161239758 |
| H29  | -1.6239413928 | 10.7096513251 | 9.8808837616  |
| H30  | -2.6964490697 | 11.9029875746 | 10.6470761478 |
| H31  | -1.1073485746 | 11.5470059966 | 11.3706385419 |
| C32  | 2.6506367421  | 8.9993605757  | 10.7082807855 |
| H33  | 2.8179383890  | 8.1312955548  | 10.0331172744 |
| H34  | 1.8669332848  | 8.6761116829  | 11.4274306013 |
| C35  | 3.9492122524  | 9.3290813794  | 11.4444734256 |
| H36  | 4.7810752612  | 9.3803964813  | 10.7194264502 |
| H37  | 4.2062187351  | 8.5806547785  | 12.2133757049 |
| C38  | 3.2585575628  | 10.7140559662 | 13.9561065621 |
| H39  | 4.0696192047  | 10.0718274009 | 14.3476043356 |
| C40  | 1.9466944582  | 9.9199620852  | 14.0668804790 |
| H41  | 1.1006968812  | 10.4659985767 | 13.6226388409 |

|     |              |               |               |
|-----|--------------|---------------|---------------|
| H42 | 1.7120770201 | 9.7443355822  | 15.1319076850 |
| H43 | 2.0184921379 | 8.9350540596  | 13.5787359513 |
| H44 | 3.4282789406 | 10.2656467828 | 8.6495845164  |
| C45 | 3.2203389054 | 12.0049976358 | 14.7914838866 |
| H46 | 4.1859375555 | 12.5372681964 | 14.7871503774 |
| H47 | 2.9860556880 | 11.7569230229 | 15.8419363637 |
| H48 | 2.4445347223 | 12.6971795644 | 14.4292630175 |
| C49 | 5.5271480516 | 11.6663856115 | 12.3739227388 |
| H50 | 5.4225656609 | 12.5590477179 | 13.0184944813 |
| C51 | 6.1524207342 | 12.1179043894 | 11.0462632224 |
| H52 | 5.6320944390 | 12.9924225087 | 10.6327871072 |
| H53 | 6.1281648893 | 11.3216262119 | 10.2818244093 |
| H54 | 7.2092418666 | 12.3922545285 | 11.2099931532 |
| C55 | 6.4358403580 | 10.6427808221 | 13.0817035807 |
| H56 | 6.5574590246 | 9.7279984645  | 12.4759056849 |
| H57 | 6.0679070077 | 10.3478591101 | 14.0774039693 |
| H58 | 7.4405228035 | 11.0802835413 | 13.2206721358 |
| C59 | 1.2559847280 | 12.4678425815 | 11.9601405914 |
| H60 | 3.9032809255 | 12.7210817810 | 9.4493126742  |
| H61 | 2.7818803330 | 13.3645562238 | 10.8809716804 |
| O62 | 4.0961446347 | 10.2555162262 | 7.8870325881  |
| C63 | 4.2231137799 | 8.9122291812  | 7.4433038553  |
| H64 | 4.1507648119 | 12.1296516601 | 9.0385242013  |
| H65 | 3.2698820004 | 8.4925449670  | 7.0519520443  |
| H66 | 4.5897653054 | 8.2240305852  | 8.2361166129  |
| H67 | 4.9577654606 | 8.8867082785  | 6.6184285157  |

**Name** - OFe\\G=-1604.497614\\H=-1604.408226\\SCF E(PBE-D3/BS1)=-  
1604.94494191930\\ZeroPoint=317.315

| Angstroms |               |               |               |
|-----------|---------------|---------------|---------------|
| Atom      | x             | y             | z             |
| Fe1       | 1.8707542149  | 12.0365546566 | 10.7078885547 |
| O2        | 2.5805932185  | 14.8183102890 | 11.1510032995 |
| P3        | 0.2822708630  | 12.4176604549 | 9.2515126854  |
| N4        | 2.1031998292  | 10.4278421461 | 9.8224022719  |
| C5        | 1.3370658434  | 9.9609333203  | 8.6509234082  |
| H6        | 0.6348340945  | 9.1586646760  | 8.9691112134  |
| H7        | 2.0252192648  | 9.4804660593  | 7.9217363036  |
| C8        | 0.5669436633  | 11.0961168474 | 7.9682916481  |
| H9        | -0.3723626348 | 10.7459107727 | 7.5064233555  |
| H10       | 1.1806616403  | 11.5512450913 | 7.1726884836  |
| P11       | 3.3360302358  | 11.2841145640 | 12.1359623073 |
| C12       | 0.2212215138  | 14.0310754660 | 8.2818917930  |
| H13       | 0.0417186761  | 14.7981898835 | 9.0591509154  |
| C14       | 1.5909557808  | 14.3194566359 | 7.6435777144  |
| H15       | 1.8075366731  | 13.6180474817 | 6.8187422356  |
| H16       | 2.4050890354  | 14.2379036695 | 8.3806159631  |
| H17       | 1.6032031657  | 15.3390356341 | 7.2197391866  |
| C18       | -0.9087022755 | 14.0927927766 | 7.2417495319  |
| H19       | -0.8712781831 | 15.0532260890 | 6.6972741664  |

|     |               |               |               |
|-----|---------------|---------------|---------------|
| H20 | -1.9082511764 | 14.0112200361 | 7.6985491317  |
| H21 | -0.8081301473 | 13.2861251322 | 6.4942648951  |
| C22 | -1.4881605738 | 12.1528008460 | 9.8299528703  |
| H23 | -2.1303888600 | 12.1723333592 | 8.9286785251  |
| C24 | -1.9111044654 | 13.2759490299 | 10.7885381532 |
| H25 | -1.9068820108 | 14.2662035459 | 10.3027356536 |
| H26 | -1.2250209438 | 13.3167340478 | 11.6527740626 |
| H27 | -2.9324980231 | 13.0922759973 | 11.1667204631 |
| C28 | -1.6036442018 | 10.7738702386 | 10.4996029015 |
| H29 | -1.4097911216 | 9.9518520704  | 9.7907963337  |
| H30 | -2.6198588173 | 10.6306181607 | 10.9087460808 |
| H31 | -0.8744639286 | 10.6916462460 | 11.3239549337 |
| C32 | 3.0122107066  | 9.3368013293  | 10.2318535142 |
| H33 | 3.8800102014  | 9.3097998764  | 9.5379142919  |
| H34 | 2.5029517093  | 8.3560283593  | 10.1129679931 |
| C35 | 3.4929871793  | 9.4851644880  | 11.6808512489 |
| H36 | 4.5178392079  | 9.1019562204  | 11.8254017505 |
| H37 | 2.8325098034  | 8.9225913125  | 12.3612805729 |
| C38 | 2.9810203895  | 11.3061261881 | 13.9819437006 |
| H39 | 3.7916636540  | 10.7342934885 | 14.4734212027 |
| C40 | 1.6338419814  | 10.6314473454 | 14.2853800770 |
| H41 | 0.8213697787  | 11.1431606750 | 13.7418580060 |
| H42 | 1.4211302918  | 10.6828760047 | 15.3680932670 |
| H43 | 1.6160999232  | 9.5686080693  | 13.9923339645 |
| H44 | 0.8899058649  | 12.2255410450 | 11.8133816550 |
| C45 | 2.9916894026  | 12.7580232157 | 14.4902228827 |
| H46 | 3.9722538671  | 13.2446976741 | 14.3577465159 |
| H47 | 2.7448516075  | 12.7885252775 | 15.5661012572 |
| H48 | 2.2390214492  | 13.3571329010 | 13.9492392379 |
| C49 | 5.0736101616  | 11.9959656465 | 11.9772911672 |
| H50 | 4.9356721237  | 13.0736245665 | 12.1868353396 |
| C51 | 5.5307147130  | 11.8547045497 | 10.5147556026 |
| H52 | 4.7555031545  | 12.2285014879 | 9.8246585871  |
| H53 | 5.7334523332  | 10.7997191943 | 10.2593822608 |
| H54 | 6.4628134276  | 12.4219472595 | 10.3456737068 |
| C55 | 6.1039542613  | 11.4197514084 | 12.9586489560 |
| H56 | 6.2195787167  | 10.3290625322 | 12.8296564704 |
| H57 | 5.8366575873  | 11.6102797219 | 14.0107005296 |
| H58 | 7.0938881432  | 11.8766626049 | 12.7800650255 |
| C59 | 2.2708722246  | 13.6782963363 | 10.9772332595 |

## Natural Bond order analysis data

**Table S2:** Population analysis data along IRC in TS-A1.

|    | 1Fe      | 2N      | 3CO      | 4H      | 5P       | 6P       | 7Me      | 8Me      | 9H      | 10Me    | 11O     |
|----|----------|---------|----------|---------|----------|----------|----------|----------|---------|---------|---------|
| 1  | 26.31669 | 7.67537 | 13.93949 | 1.09132 | 13.83315 | 13.86484 | 66.55711 | 66.57474 | 0.52953 | 8.79799 | 8.81974 |
| 2  | 26.31831 | 7.67962 | 13.93931 | 1.08892 | 13.83244 | 13.86594 | 66.55737 | 66.57452 | 0.52749 | 8.79603 | 8.82006 |
| 3  | 26.31991 | 7.68374 | 13.93942 | 1.08594 | 13.83141 | 13.86754 | 66.55755 | 66.57435 | 0.52626 | 8.79366 | 8.82022 |
| 4  | 26.32216 | 7.68707 | 13.9394  | 1.08288 | 13.83039 | 13.86867 | 66.55811 | 66.57413 | 0.52607 | 8.79075 | 8.82038 |
| 5  | 26.32509 | 7.68974 | 13.93962 | 1.07896 | 13.82954 | 13.87    | 66.55865 | 66.5742  | 0.52676 | 8.78723 | 8.8202  |
| 6  | 26.32149 | 7.69193 | 13.94112 | 1.07674 | 13.82899 | 13.87417 | 66.55675 | 66.57342 | 0.52818 | 8.78344 | 8.82018 |
| 7  | 26.32361 | 7.69407 | 13.94248 | 1.07265 | 13.82825 | 13.87569 | 66.56167 | 66.57377 | 0.52995 | 8.77869 | 8.81919 |
| 8  | 26.32623 | 7.69568 | 13.94419 | 1.06782 | 13.82741 | 13.87716 | 66.56343 | 66.57475 | 0.53172 | 8.77374 | 8.81788 |
| 9  | 26.3285  | 7.69762 | 13.9461  | 1.06306 | 13.82693 | 13.87846 | 66.5653  | 66.57581 | 0.53311 | 8.76877 | 8.81635 |
| 10 | 26.33085 | 7.69947 | 13.94816 | 1.05824 | 13.82682 | 13.88003 | 66.56754 | 66.57745 | 0.53385 | 8.7636  | 8.81401 |
| 11 | 26.33362 | 7.70149 | 13.95038 | 1.05335 | 13.82671 | 13.88128 | 66.5701  | 66.57939 | 0.53363 | 8.75844 | 8.81156 |
| 12 | 26.33582 | 7.70354 | 13.95261 | 1.04878 | 13.82686 | 13.88253 | 66.57472 | 66.58152 | 0.53271 | 8.75357 | 8.80936 |
| 13 | 26.34068 | 7.70579 | 13.95514 | 1.0424  | 13.82774 | 13.88454 | 66.57501 | 66.58641 | 0.53031 | 8.74801 | 8.80669 |
| 14 | 26.34275 | 7.7086  | 13.95749 | 1.0385  | 13.82684 | 13.88479 | 66.57755 | 66.58627 | 0.52832 | 8.74373 | 8.80515 |
| 15 | 26.34482 | 7.71042 | 13.98018 | 1.03475 | 13.82691 | 13.88523 | 66.58009 | 66.58887 | 0.52605 | 8.7398  | 8.80287 |
| 16 | 26.34785 | 7.71166 | 13.96218 | 1.031   | 13.82679 | 13.88542 | 66.58287 | 66.59158 | 0.52359 | 8.73665 | 8.80039 |
| 17 | 26.348   | 7.71314 | 13.96492 | 1.02782 | 13.82698 | 13.88636 | 66.58526 | 66.59376 | 0.52108 | 8.73349 | 8.79917 |
| 18 | 26.34882 | 7.71417 | 13.96792 | 1.02489 | 13.82713 | 13.88651 | 66.58782 | 66.59667 | 0.51824 | 8.73067 | 8.79714 |
| 19 | 26.34912 | 7.71493 | 13.97025 | 1.02241 | 13.82743 | 13.88657 | 66.59013 | 66.5993  | 0.5158  | 8.72856 | 8.79551 |
| 20 | 26.35125 | 7.7155  | 13.97175 | 1.01951 | 13.82799 | 13.88702 | 66.59218 | 66.60168 | 0.51309 | 8.72638 | 8.7937  |
| 21 | 26.35182 | 7.71598 | 13.97325 | 1.01776 | 13.82808 | 13.88799 | 66.59448 | 66.60423 | 0.51063 | 8.72444 | 8.7922  |
| 22 | 26.35341 | 7.71646 | 13.97422 | 1.01562 | 13.82861 | 13.88711 | 66.59656 | 66.60648 | 0.50823 | 8.72264 | 8.79066 |
| 23 | 26.35468 | 7.71687 | 13.97495 | 1.01389 | 13.82884 | 13.88688 | 66.59885 | 66.61068 | 0.506   | 8.72093 | 8.78941 |

**Table S3:** Population analysis data along IRC in TS-B1.

|    | 1Fe      | 2N      | 3CO      | 4H      | 5P       | 6P       | 7H      | 8H      | 9O      | 10CH2   | 11Me     | 12Me     |
|----|----------|---------|----------|---------|----------|----------|---------|---------|---------|---------|----------|----------|
| 1  | 26.38806 | 7.69    | 13.9657  | 0.97133 | 13.86743 | 13.872   | 0.86534 | 0.54168 | 8.7982  | 7.94196 | 66.54112 | 66.53711 |
| 2  | 26.42605 | 7.68736 | 13.9632  | 0.98048 | 13.86502 | 13.86886 | 0.89107 | 0.54201 | 8.7894  | 7.88194 | 66.54506 | 66.53911 |
| 3  | 26.44145 | 7.68353 | 13.95968 | 0.98859 | 13.86222 | 13.86695 | 0.92942 | 0.5424  | 8.77616 | 7.85551 | 66.5509  | 66.54001 |
| 4  | 26.46281 | 7.67824 | 13.95492 | 1.00609 | 13.85831 | 13.86247 | 0.95828 | 0.5426  | 8.75846 | 7.82394 | 66.55152 | 66.54172 |
| 5  | 26.47213 | 7.67537 | 13.95279 | 1.02238 | 13.85736 | 13.86031 | 0.98588 | 0.54301 | 8.74159 | 7.79049 | 66.55448 | 66.54421 |
| 6  | 26.48309 | 7.67259 | 13.95056 | 1.03615 | 13.85604 | 13.85727 | 1.01239 | 0.54345 | 8.72433 | 7.75919 | 66.55802 | 66.54695 |
| 7  | 26.49312 | 7.66981 | 13.94909 | 1.04868 | 13.85469 | 13.85474 | 1.03817 | 0.54396 | 8.70772 | 7.72842 | 66.56174 | 66.54985 |
| 8  | 26.50318 | 7.66721 | 13.94823 | 1.06126 | 13.84984 | 13.85334 | 1.06199 | 0.5447  | 8.69086 | 7.69879 | 66.5679  | 66.55267 |
| 9  | 26.51197 | 7.66452 | 13.94778 | 1.07315 | 13.84906 | 13.8507  | 1.08248 | 0.54556 | 8.67573 | 7.67135 | 66.57188 | 66.55621 |
| 10 | 26.51949 | 7.66225 | 13.94752 | 1.08366 | 13.84781 | 13.84934 | 1.10035 | 0.54648 | 8.66103 | 7.6471  | 66.57559 | 66.55845 |
| 11 | 26.52446 | 7.66089 | 13.94711 | 1.09378 | 13.84742 | 13.84882 | 1.11521 | 0.54739 | 8.64822 | 7.62541 | 66.57895 | 66.56234 |
| 12 | 26.52946 | 7.65836 | 13.94742 | 1.10368 | 13.84669 | 13.84744 | 1.12831 | 0.54849 | 8.63577 | 7.60598 | 66.58271 | 66.56568 |
| 13 | 26.53447 | 7.65672 | 13.94782 | 1.11174 | 13.84608 | 13.84661 | 1.13911 | 0.54917 | 8.63512 | 7.58881 | 66.58572 | 66.5686  |
| 14 | 26.53795 | 7.65557 | 13.94863 | 1.1187  | 13.8452  | 13.84641 | 1.14838 | 0.54963 | 8.61587 | 7.57369 | 66.58853 | 66.57143 |
| 15 | 26.54041 | 7.65558 | 13.9491  | 1.12517 | 13.84504 | 13.84733 | 1.1553  | 0.5499  | 8.60809 | 7.56023 | 66.59042 | 66.57345 |
| 16 | 26.54293 | 7.65381 | 13.95021 | 1.13123 | 13.84583 | 13.84702 | 1.16245 | 0.55036 | 8.60015 | 7.54864 | 66.59043 | 66.57654 |
| 17 | 26.53963 | 7.65302 | 13.95149 | 1.13808 | 13.84714 | 13.84714 | 1.16864 | 0.55075 | 8.59335 | 7.52873 | 66.59377 | 66.5788  |
| 18 | 26.54107 | 7.65221 | 13.95237 | 1.14318 | 13.84679 | 13.84702 | 1.17347 | 0.55096 | 8.58715 | 7.52958 | 66.59536 | 66.58082 |
| 19 | 26.54249 | 7.65169 | 13.95304 | 1.14772 | 13.84682 | 13.84708 | 1.17708 | 0.55154 | 8.58136 | 7.52166 | 66.59727 | 66.58256 |
| 20 | 26.5441  | 7.65094 | 13.95378 | 1.15206 | 13.84673 | 13.84683 | 1.18024 | 0.55154 | 8.57568 | 7.51496 | 66.59889 | 66.58453 |
| 21 | 26.54462 | 7.65043 | 13.9545  | 1.1566  | 13.84664 | 13.84682 | 1.18275 | 0.55184 | 8.57049 | 7.50886 | 66.60046 | 66.58604 |
